# Supplementary material for: Improving the theoretical description of Ln(iii)/An(iii) separation with phosphinic acid ligands: a benchmarking study of structure and selectivity
Source: Royal Society of Chemistry journal article supplement (doi:10.1039/d1cp02466c), 2021-01-01
Supplement: d1cp02466c1.pdf [file d1cp02466c1.pdf]

Electronic Supplementary Information

## Improving the Theoretical Description of Ln(III)/An(III) Separation with Phosphinic Acid Ligands: A Benchmarking Study of Structure and Selectivity

Robert C. Chapleski, Jr.,<sup>a</sup> Alexander S. Ivanov,<sup>a</sup> Kirk A. Peterson,<sup>\*,b</sup> and  
Vyacheslav S. Bryantsev<sup>\*,a</sup>

<sup>a</sup>Chemical Sciences Division, Oak Ridge National Laboratory, 1 Bethel Valley Road, Oak Ridge,  
TN 27831, USA

<sup>b</sup>Department of Chemistry, Washington State University, Pullman, WA 99164, USA

|                                                                                                  |           |
|--------------------------------------------------------------------------------------------------|-----------|
| <b>A. Comparison of MP2 f-in-valence (SC ECP) Reaction Energies .....</b>                        | <b>2</b>  |
| <b>B. DFT Second-Order Stabilization Energies (<math>E^{(2)}</math>) .....</b>                   | <b>2</b>  |
| <b>C. Additional Basis Functions for Am(III) and Eu(III) in aug-cc-pwCVTZ Calculations .....</b> | <b>3</b>  |
| <b>D. Recontracted cc-pVTZ-PP Basis Sets for Am(III) and Eu(III) .....</b>                       | <b>3</b>  |
| <b>E. Cartesian Spatial Coordinates for all Optimized Structures .....</b>                       | <b>23</b> |
| <b>F. Supplementary References .....</b>                                                         | <b>38</b> |

## A. Comparison of MP2 f-in-valence (SC ECP) Reaction Energies

Table S1: MP2 SC ECP Energies of  $\text{Am}(\text{H}_2\text{PO}_2)_3 + \text{Eu}(\text{H}_2\text{PX}_2)_3 \rightarrow \text{Am}(\text{H}_2\text{PX}_2)_3 + \text{Eu}(\text{H}_2\text{PO}_2)_3$  reactions, kcal/mol. 74 electrons were correlated for all species (see main body of text). MP2 calculations without RI approximation (columns 1 and 2) were calculated using MOLPRO software,<sup>1,2</sup> and RI-MP2 calculations (column 3) were calculated using ORCA.<sup>3-5</sup>

|             | ROHF MP2 SC ECP | UHF MP2 SC ECP | UHF RI-MP2 SC ECP |
|-------------|-----------------|----------------|-------------------|
| <b>X=S</b>  |                 |                |                   |
| aug-cc-pVDZ | -3.96           | -3.94          | -4.24             |
| aug-cc-pVTZ | -4.03           | -4.00          | -4.30             |
| <b>X=Se</b> |                 |                |                   |
| aug-cc-pVDZ | -4.62           | -4.65          | -5.07             |
| aug-cc-pVTZ | -4.32           | -4.35          | -4.74             |
| <b>X=Te</b> |                 |                |                   |
| aug-cc-pVDZ | -6.02           | -6.05          | -6.09             |
| aug-cc-pVTZ | -4.60           | -4.59          | -4.77             |

## B. DFT Second-Order Stabilization Energies ( $E^{(2)}$ )

Table S2: DFT Second-Order Stabilization Energies for Forward and Back Donation.

Forward donation, kcal/mol (L→M)

|          |                                                    |                                                    |                                                     |                                                     |
|----------|----------------------------------------------------|----------------------------------------------------|-----------------------------------------------------|-----------------------------------------------------|
|          | <b>Eu(H<sub>2</sub>PO<sub>2</sub>)<sub>3</sub></b> | <b>Eu(H<sub>2</sub>PS<sub>2</sub>)<sub>3</sub></b> | <b>Eu(H<sub>2</sub>PSe<sub>2</sub>)<sub>3</sub></b> | <b>Eu(H<sub>2</sub>PTe<sub>2</sub>)<sub>3</sub></b> |
| B3LYP    | 176.94                                             | 664.04                                             | 704.6                                               | 699.02                                              |
| B5050LYP | 294.28                                             | 970.65                                             | 1140.98                                             | 1263.42                                             |
|          | <b>Am(H<sub>2</sub>PO<sub>2</sub>)<sub>3</sub></b> | <b>Am(H<sub>2</sub>PS<sub>2</sub>)<sub>3</sub></b> | <b>Am(H<sub>2</sub>PSe<sub>2</sub>)<sub>3</sub></b> | <b>Am(H<sub>2</sub>PTe<sub>2</sub>)<sub>3</sub></b> |
| B3LYP    | 175.97                                             | 645.3                                              | 757.29                                              | 1007.01                                             |
| B5050LYP | 258.52                                             | 916.77                                             | 1056.65                                             | 1243.56                                             |

Back donation, kcal/mol (M→L)

|          |                                                    |                                                    |                                                     |                                                     |
|----------|----------------------------------------------------|----------------------------------------------------|-----------------------------------------------------|-----------------------------------------------------|
|          | <b>Eu(H<sub>2</sub>PO<sub>2</sub>)<sub>3</sub></b> | <b>Eu(H<sub>2</sub>PS<sub>2</sub>)<sub>3</sub></b> | <b>Eu(H<sub>2</sub>PSe<sub>2</sub>)<sub>3</sub></b> | <b>Eu(H<sub>2</sub>PTe<sub>2</sub>)<sub>3</sub></b> |
| B3LYP    | 55.25                                              | 19.43                                              | 13.89                                               | 9.28                                                |
| B5050LYP | 25.36                                              | 5.5                                                | 3.24                                                | 0.83                                                |
|          | <b>Am(H<sub>2</sub>PO<sub>2</sub>)<sub>3</sub></b> | <b>Am(H<sub>2</sub>PS<sub>2</sub>)<sub>3</sub></b> | <b>Am(H<sub>2</sub>PSe<sub>2</sub>)<sub>3</sub></b> | <b>Am(H<sub>2</sub>PTe<sub>2</sub>)<sub>3</sub></b> |
| B3LYP    | 128.27                                             | 65.67                                              | 46.97                                               | 29.64                                               |
| B5050LYP | 86.67                                              | 43.54                                              | 27.55                                               | 14.2                                                |

### C. Additional Basis Functions for Am(III) and Eu(III) in aug-cc-pwCVTZ Calculations

The following basis functions were added to the Dolg ECP28MWB\_ANO basis set<sup>6,7</sup> for Eu(III) in aug-cc-pwCVnZ calculations presented in Table 3 of the main body of text:

s,Eu,1.0527690E+01,6.6356370E+00  
p,Eu,9.0665380E+00,6.0491120E+00  
d,Eu,1.4506110E+01,7.6754510E+00  
f,Eu,7.3173440E+00,3.0372840E+00  
g,Eu,9.2594070E+00

The following basis functions were added to the Dolg ECP60MWB\_ANO basis set<sup>8,9</sup> for Am(III) in aug-cc-pwCVnZ calculations presented in Table 3 of the main body of text:

s,Am,8.7069655E+00,5.3198651E+00  
p,Am,6.8589925E+00,3.7470795E+00  
d,Am,7.3983569E+00,4.2739044E+00  
f,Am,9.6480742E+00,4.6241999E+00  
g,Am,4.7742905E+00

### D. Recontracted cc-pVTZ-PP Basis Sets for Am(III) and Eu(III)

The following basis set for Eu(III) was constructed by re-contracting the cc-pVTZ-DK3 set in the presence of the ECP28MWB ECP using the procedure outlined in Ref. <sup>10</sup>.

| S  | 30            |              |
|----|---------------|--------------|
| 1  | 6.9855600E+07 | 1.38885E-08  |
| 2  | 1.8422660E+07 | 3.57883E-08  |
| 3  | 6.1949800E+06 | 1.80190E-07  |
| 4  | 2.2928270E+06 | 3.84669E-07  |
| 5  | 9.1381600E+05 | 1.76236E-06  |
| 6  | 3.8128830E+05 | 3.07212E-06  |
| 7  | 1.6555900E+05 | 1.40276E-05  |
| 8  | 7.4280470E+04 | 2.06713E-05  |
| 9  | 3.4342950E+04 | 9.51601E-05  |
| 10 | 1.6316470E+04 | 1.17809E-04  |
| 11 | 7.9497860E+03 | 5.58477E-04  |
| 12 | 3.9636570E+03 | 5.45111E-04  |
| 13 | 2.0184970E+03 | 2.76572E-03  |
| 14 | 1.0481120E+03 | 1.58540E-03  |
| 15 | 5.5373610E+02 | 1.03513E-02  |
| 16 | 2.9670960E+02 | -2.02035E-03 |
| 17 | 1.5886880E+02 | 2.75114E-02  |
| 18 | 8.7062830E+01 | -3.49489E-02 |
| 19 | 4.7924070E+01 | 9.26072E-03  |
| 20 | 2.5489300E+01 | 4.41874E-01  |
| 21 | 1.4533130E+01 | -1.06482E+00 |
| 22 | 8.0949100E+00 | 1.36174E-02  |
| 23 | 4.2748700E+00 | 7.38190E-01  |
| 24 | 2.2631260E+00 | 5.65356E-01  |
| 25 | 1.0266980E+00 | 5.12784E-02  |

|    |               |              |
|----|---------------|--------------|
| 26 | 5.3394470E-01 | 7.33721E-02  |
| 27 | 2.5806550E-01 | 2.00561E-02  |
| 28 | 6.5975540E-02 | 8.14713E-03  |
| 29 | 3.3914920E-02 | 3.66000E-03  |
| 30 | 1.6765960E-02 | 2.30871E-03  |
| S  | 30            |              |
| 1  | 6.9855600E+07 | -1.62121E-08 |
| 2  | 1.8422660E+07 | -4.58252E-08 |
| 3  | 6.1949800E+06 | -2.01225E-07 |
| 4  | 2.2928270E+06 | -5.15859E-07 |
| 5  | 9.1381600E+05 | -1.91904E-06 |
| 6  | 3.8128830E+05 | -4.26583E-06 |
| 7  | 1.6555900E+05 | -1.50458E-05 |
| 8  | 7.4280470E+04 | -2.96009E-05 |
| 9  | 3.4342950E+04 | -1.00678E-04 |
| 10 | 1.6316470E+04 | -1.75427E-04 |
| 11 | 7.9497860E+03 | -5.81002E-04 |
| 12 | 3.9636570E+03 | -8.67839E-04 |
| 13 | 2.0184970E+03 | -2.80125E-03 |
| 14 | 1.0481120E+03 | -3.09088E-03 |
| 15 | 5.5373610E+02 | -9.81180E-03 |
| 16 | 2.9670960E+02 | -3.24439E-03 |
| 17 | 1.5886880E+02 | -2.13555E-02 |
| 18 | 8.7062830E+01 | 2.14798E-02  |
| 19 | 4.7924070E+01 | -2.15588E-02 |
| 20 | 2.5489300E+01 | -2.07020E-01 |
| 21 | 1.4533130E+01 | 5.78025E-01  |
| 22 | 8.0949100E+00 | -1.83288E-02 |
| 23 | 4.2748700E+00 | -5.28647E-01 |
| 24 | 2.2631260E+00 | -6.37713E-01 |
| 25 | 1.0266980E+00 | 2.53244E-01  |
| 26 | 5.3394470E-01 | 6.47471E-01  |
| 27 | 2.5806550E-01 | 2.39602E-01  |
| 28 | 6.5975540E-02 | 1.57366E-01  |
| 29 | 3.3914920E-02 | 1.48055E-01  |
| 30 | 1.6765960E-02 | 4.89031E-02  |
| S  | 30            |              |
| 1  | 6.9855600E+07 | 1.07459E-08  |
| 2  | 1.8422660E+07 | 3.07188E-08  |
| 3  | 6.1949800E+06 | 1.32602E-07  |
| 4  | 2.2928270E+06 | 3.47612E-07  |
| 5  | 9.1381600E+05 | 1.26024E-06  |
| 6  | 3.8128830E+05 | 2.88535E-06  |
| 7  | 1.6555900E+05 | 9.85976E-06  |
| 8  | 7.4280470E+04 | 2.00858E-05  |
| 9  | 3.4342950E+04 | 6.58467E-05  |
| 10 | 1.6316470E+04 | 1.19504E-04  |
| 11 | 7.9497860E+03 | 3.79069E-04  |
| 12 | 3.9636570E+03 | 5.94960E-04  |
| 13 | 2.0184970E+03 | 1.82032E-03  |
| 14 | 1.0481120E+03 | 2.15494E-03  |

|    |               |              |
|----|---------------|--------------|
| 15 | 5.5373610E+02 | 6.30822E-03  |
| 16 | 2.9670960E+02 | 2.63851E-03  |
| 17 | 1.5886880E+02 | 1.31960E-02  |
| 18 | 8.7062830E+01 | -1.24198E-02 |
| 19 | 4.7924070E+01 | 1.48520E-02  |
| 20 | 2.5489300E+01 | 1.09164E-01  |
| 21 | 1.4533130E+01 | -3.17197E-01 |
| 22 | 8.0949100E+00 | 5.96779E-03  |
| 23 | 4.2748700E+00 | 3.19196E-01  |
| 24 | 2.2631260E+00 | 3.92614E-01  |
| 25 | 1.0266980E+00 | -1.71389E-01 |
| 26 | 5.3394470E-01 | -5.78091E-01 |
| 27 | 2.5806550E-01 | -3.54665E-01 |
| 28 | 6.5975540E-02 | 5.00209E-01  |
| 29 | 3.3914920E-02 | 4.95438E-01  |
| 30 | 1.6765960E-02 | 1.62714E-01  |
| S  | 30            |              |
| 1  | 6.9855600E+07 | 3.03656E-08  |
| 2  | 1.8422660E+07 | 8.75859E-08  |
| 3  | 6.1949800E+06 | 3.72949E-07  |
| 4  | 2.2928270E+06 | 9.95171E-07  |
| 5  | 9.1381600E+05 | 3.53452E-06  |
| 6  | 3.8128830E+05 | 8.28450E-06  |
| 7  | 1.6555900E+05 | 2.76054E-05  |
| 8  | 7.4280470E+04 | 5.78139E-05  |
| 9  | 3.4342950E+04 | 1.84066E-04  |
| 10 | 1.6316470E+04 | 3.45017E-04  |
| 11 | 7.9497860E+03 | 1.05755E-03  |
| 12 | 3.9636570E+03 | 1.72622E-03  |
| 13 | 2.0184970E+03 | 5.06184E-03  |
| 14 | 1.0481120E+03 | 6.33650E-03  |
| 15 | 5.5373610E+02 | 1.73790E-02  |
| 16 | 2.9670960E+02 | 8.64577E-03  |
| 17 | 1.5886880E+02 | 3.49297E-02  |
| 18 | 8.7062830E+01 | -3.08817E-02 |
| 19 | 4.7924070E+01 | 5.25364E-02  |
| 20 | 2.5489300E+01 | 1.60051E-01  |
| 21 | 1.4533130E+01 | -5.63842E-01 |
| 22 | 8.0949100E+00 | -2.92780E-02 |
| 23 | 4.2748700E+00 | 9.36827E-01  |
| 24 | 2.2631260E+00 | 5.60139E-01  |
| 25 | 1.0266980E+00 | -1.49601E+00 |
| 26 | 5.3394470E-01 | -8.64676E-01 |
| 27 | 2.5806550E-01 | 1.54104E+00  |
| 28 | 6.5975540E-02 | 9.77856E-01  |
| 29 | 3.3914920E-02 | -1.12837E+00 |
| 30 | 1.6765960E-02 | -1.80940E-01 |
| S  | 30            |              |
| 1  | 6.9855600E+07 | -5.47770E-08 |
| 2  | 1.8422660E+07 | -1.60018E-07 |
| 3  | 6.1949800E+06 | -6.68222E-07 |

|    |               |              |
|----|---------------|--------------|
| 4  | 2.2928270E+06 | -1.82855E-06 |
| 5  | 9.1381600E+05 | -6.30704E-06 |
| 6  | 3.8128830E+05 | -1.52837E-05 |
| 7  | 1.6555900E+05 | -4.91350E-05 |
| 8  | 7.4280470E+04 | -1.07021E-04 |
| 9  | 3.4342950E+04 | -3.26849E-04 |
| 10 | 1.6316470E+04 | -6.41273E-04 |
| 11 | 7.9497860E+03 | -1.87237E-03 |
| 12 | 3.9636570E+03 | -3.22913E-03 |
| 13 | 2.0184970E+03 | -8.91750E-03 |
| 14 | 1.0481120E+03 | -1.20459E-02 |
| 15 | 5.5373610E+02 | -3.02089E-02 |
| 16 | 2.9670960E+02 | -1.83745E-02 |
| 17 | 1.5886880E+02 | -5.75511E-02 |
| 18 | 8.7062830E+01 | 4.50856E-02  |
| 19 | 4.7924070E+01 | -8.81008E-02 |
| 20 | 2.5489300E+01 | -2.20849E-01 |
| 21 | 1.4533130E+01 | 8.87523E-01  |
| 22 | 8.0949100E+00 | -8.90782E-02 |
| 23 | 4.2748700E+00 | -1.76129E+00 |
| 24 | 2.2631260E+00 | -9.32897E-02 |
| 25 | 1.0266980E+00 | 4.10348E+00  |
| 26 | 5.3394470E-01 | -3.53813E+00 |
| 27 | 2.5806550E-01 | -1.62827E-01 |
| 28 | 6.5975540E-02 | 2.55950E+00  |
| 29 | 3.3914920E-02 | -1.70694E+00 |
| 30 | 1.6765960E-02 | -2.25223E-01 |
| S  | 30            |              |
| 1  | 6.9855600E+07 | -1.09333E-07 |
| 2  | 1.8422660E+07 | -3.07540E-07 |
| 3  | 6.1949800E+06 | -1.36042E-06 |
| 4  | 2.2928270E+06 | -3.45412E-06 |
| 5  | 9.1381600E+05 | -1.29931E-05 |
| 6  | 3.8128830E+05 | -2.85165E-05 |
| 7  | 1.6555900E+05 | -1.01962E-04 |
| 8  | 7.4280470E+04 | -1.97605E-04 |
| 9  | 3.4342950E+04 | -6.82853E-04 |
| 10 | 1.6316470E+04 | -1.16926E-03 |
| 11 | 7.9497860E+03 | -3.94519E-03 |
| 12 | 3.9636570E+03 | -5.77327E-03 |
| 13 | 2.0184970E+03 | -1.90570E-02 |
| 14 | 1.0481120E+03 | -2.04986E-02 |
| 15 | 5.5373610E+02 | -6.69915E-02 |
| 16 | 2.9670960E+02 | -2.10247E-02 |
| 17 | 1.5886880E+02 | -1.46109E-01 |
| 18 | 8.7062830E+01 | 1.56948E-01  |
| 19 | 4.7924070E+01 | -3.36276E-01 |
| 20 | 2.5489300E+01 | 1.11115E-01  |
| 21 | 1.4533130E+01 | 6.83475E-01  |
| 22 | 8.0949100E+00 | 6.39465E-01  |
| 23 | 4.2748700E+00 | -5.41518E+00 |

|    |               |              |
|----|---------------|--------------|
| 24 | 2.2631260E+00 | 6.33243E+00  |
| 25 | 1.0266980E+00 | -1.07294E+00 |
| 26 | 5.3394470E-01 | -4.33676E+00 |
| 27 | 2.5806550E-01 | 4.57985E+00  |
| 28 | 6.5975540E-02 | -2.89401E+00 |
| 29 | 3.3914920E-02 | 1.24107E+00  |
| 30 | 1.6765960E-02 | 3.54559E-01  |
| P  | 24            |              |
| 1  | 1.4590550E+07 | -3.25601E-10 |
| 2  | 2.4896360E+06 | 4.85118E-09  |
| 3  | 5.5880580E+05 | -2.48765E-08 |
| 4  | 1.4833850E+05 | 2.59818E-07  |
| 5  | 4.4801660E+04 | -4.89034E-07 |
| 6  | 1.5127620E+04 | 7.40871E-06  |
| 7  | 5.6543160E+03 | -3.14915E-06 |
| 8  | 2.3098440E+03 | 1.29836E-04  |
| 9  | 1.0153770E+03 | 7.45006E-06  |
| 10 | 4.7331040E+02 | 1.41004E-03  |
| 11 | 2.3064360E+02 | -1.32461E-04 |
| 12 | 1.1634230E+02 | 9.38624E-03  |
| 13 | 6.0094260E+01 | -1.20715E-02 |
| 14 | 3.1423980E+01 | 8.32368E-02  |
| 15 | 1.6915250E+01 | -2.32935E-01 |
| 16 | 9.0665380E+00 | 9.69098E-03  |
| 17 | 4.7398210E+00 | 5.98084E-01  |
| 18 | 2.4537310E+00 | 4.11708E-01  |
| 19 | 1.1847470E+00 | 1.07231E-01  |
| 20 | 5.8203120E-01 | 2.57456E-02  |
| 21 | 2.7857010E-01 | 2.78586E-02  |
| 22 | 1.1871710E-01 | 1.35598E-03  |
| 23 | 4.9701490E-02 | 9.72008E-04  |
| 24 | 2.0385000E-02 | -2.36148E-04 |
| P  | 24            |              |
| 1  | 1.4590550E+07 | 1.11996E-10  |
| 2  | 2.4896360E+06 | -1.90875E-09 |
| 3  | 5.5880580E+05 | 7.56620E-09  |
| 4  | 1.4833850E+05 | -1.09462E-07 |
| 5  | 4.4801660E+04 | 7.49015E-08  |
| 6  | 1.5127620E+04 | -3.34637E-06 |
| 7  | 5.6543160E+03 | -2.00092E-06 |
| 8  | 2.3098440E+03 | -6.10615E-05 |
| 9  | 1.0153770E+03 | -5.16678E-05 |
| 10 | 4.7331040E+02 | -6.72652E-04 |
| 11 | 2.3064360E+02 | -3.43887E-04 |
| 12 | 1.1634230E+02 | -4.32644E-03 |
| 13 | 6.0094260E+01 | 3.79204E-03  |
| 14 | 3.1423980E+01 | -3.94480E-02 |
| 15 | 1.6915250E+01 | 1.27422E-01  |
| 16 | 9.0665380E+00 | -4.02599E-02 |
| 17 | 4.7398210E+00 | -3.62657E-01 |
| 18 | 2.4537310E+00 | -2.77355E-01 |

|    |               |              |
|----|---------------|--------------|
| 19 | 1.1847470E+00 | 2.07750E-01  |
| 20 | 5.8203120E-01 | 5.62839E-01  |
| 21 | 2.7857010E-01 | 3.71999E-01  |
| 22 | 1.1871710E-01 | 6.35342E-02  |
| 23 | 4.9701490E-02 | -8.65124E-04 |
| 24 | 2.0385000E-02 | 1.23224E-03  |
| P  | 24            |              |
| 1  | 1.4590550E+07 | -2.30589E-11 |
| 2  | 2.4896360E+06 | 4.12954E-10  |
| 3  | 5.5880580E+05 | -1.47548E-09 |
| 4  | 1.4833850E+05 | 2.42075E-08  |
| 5  | 4.4801660E+04 | -7.66526E-09 |
| 6  | 1.5127620E+04 | 7.55323E-07  |
| 7  | 5.6543160E+03 | 6.68369E-07  |
| 8  | 2.3098440E+03 | 1.39351E-05  |
| 9  | 1.0153770E+03 | 1.47233E-05  |
| 10 | 4.7331040E+02 | 1.54070E-04  |
| 11 | 2.3064360E+02 | 1.03342E-04  |
| 12 | 1.1634230E+02 | 9.81220E-04  |
| 13 | 6.0094260E+01 | -7.45765E-04 |
| 14 | 3.1423980E+01 | 9.00545E-03  |
| 15 | 1.6915250E+01 | -3.02190E-02 |
| 16 | 9.0665380E+00 | 1.15844E-02  |
| 17 | 4.7398210E+00 | 8.88424E-02  |
| 18 | 2.4537310E+00 | 6.81455E-02  |
| 19 | 1.1847470E+00 | -7.48708E-02 |
| 20 | 5.8203120E-01 | -1.85273E-01 |
| 21 | 2.7857010E-01 | -1.71119E-01 |
| 22 | 1.1871710E-01 | 1.59105E-01  |
| 23 | 4.9701490E-02 | 6.30813E-01  |
| 24 | 2.0385000E-02 | 3.63283E-01  |
| P  | 24            |              |
| 1  | 1.4590550E+07 | -9.11003E-11 |
| 2  | 2.4896360E+06 | 1.54705E-09  |
| 3  | 5.5880580E+05 | -6.17742E-09 |
| 4  | 1.4833850E+05 | 8.85721E-08  |
| 5  | 4.4801660E+04 | -6.30722E-08 |
| 6  | 1.5127620E+04 | 2.70343E-06  |
| 7  | 5.6543160E+03 | 1.55924E-06  |
| 8  | 2.3098440E+03 | 4.92929E-05  |
| 9  | 1.0153770E+03 | 4.10761E-05  |
| 10 | 4.7331040E+02 | 5.42938E-04  |
| 11 | 2.3064360E+02 | 2.78196E-04  |
| 12 | 1.1634230E+02 | 3.47367E-03  |
| 13 | 6.0094260E+01 | -2.90306E-03 |
| 14 | 3.1423980E+01 | 3.13198E-02  |
| 15 | 1.6915250E+01 | -1.07095E-01 |
| 16 | 9.0665380E+00 | 5.76097E-02  |
| 17 | 4.7398210E+00 | 2.93423E-01  |
| 18 | 2.4537310E+00 | 2.43185E-01  |
| 19 | 1.1847470E+00 | -5.45609E-01 |



|    |               |              |
|----|---------------|--------------|
| 20 | 5.8203120E-01 | -4.58379E-01 |
| 21 | 2.7857010E-01 | 2.28829E-01  |
| 22 | 1.1871710E-01 | 5.92841E-01  |
| 23 | 4.9701490E-02 | 3.48067E-01  |
| 24 | 2.0385000E-02 | 5.73974E-03  |
| P  | 24            |              |
| 1  | 1.4590550E+07 | -6.70494E-11 |
| 2  | 2.4896360E+06 | 1.63103E-09  |
| 3  | 5.5880580E+05 | -2.51505E-09 |
| 4  | 1.4833850E+05 | 1.06390E-07  |
| 5  | 4.4801660E+04 | 1.45024E-07  |
| 6  | 1.5127620E+04 | 3.62518E-06  |
| 7  | 5.6543160E+03 | 7.48156E-06  |
| 8  | 2.3098440E+03 | 6.98908E-05  |
| 9  | 1.0153770E+03 | 1.30912E-04  |
| 10 | 4.7331040E+02 | 7.85195E-04  |
| 11 | 2.3064360E+02 | 9.93597E-04  |
| 12 | 1.1634230E+02 | 4.85781E-03  |
| 13 | 6.0094260E+01 | -1.83266E-03 |
| 14 | 3.1423980E+01 | 4.76841E-02  |
| 15 | 1.6915250E+01 | -1.82542E-01 |
| 16 | 9.0665380E+00 | 1.21308E-01  |
| 17 | 4.7398210E+00 | 5.78220E-01  |
| 18 | 2.4537310E+00 | 2.08623E-01  |
| 19 | 1.1847470E+00 | -1.36379E+00 |
| 20 | 5.8203120E-01 | 1.52837E-02  |
| 21 | 2.7857010E-01 | 1.37585E+00  |
| 22 | 1.1871710E-01 | -3.67860E-01 |
| 23 | 4.9701490E-02 | -6.51834E-01 |
| 24 | 2.0385000E-02 | -1.49142E-03 |
| P  | 24            |              |
| 1  | 1.4590550E+07 | 5.97444E-10  |
| 2  | 2.4896360E+06 | -5.45694E-09 |
| 3  | 5.5880580E+05 | 5.98553E-08  |
| 4  | 1.4833850E+05 | -1.88525E-07 |
| 5  | 4.4801660E+04 | 2.23620E-06  |
| 6  | 1.5127620E+04 | -2.15203E-06 |
| 7  | 5.6543160E+03 | 5.00333E-05  |
| 8  | 2.3098440E+03 | -3.07052E-06 |
| 9  | 1.0153770E+03 | 6.87715E-04  |
| 10 | 4.7331040E+02 | 1.10775E-04  |
| 11 | 2.3064360E+02 | 5.64967E-03  |
| 12 | 1.1634230E+02 | -8.15106E-04 |
| 13 | 6.0094260E+01 | 2.13461E-02  |
| 14 | 3.1423980E+01 | 2.88007E-02  |
| 15 | 1.6915250E+01 | -2.44623E-01 |
| 16 | 9.0665380E+00 | 1.99503E-01  |
| 17 | 4.7398210E+00 | 1.48810E+00  |
| 18 | 2.4537310E+00 | -1.47721E+00 |
| 19 | 1.1847470E+00 | -1.32149E+00 |
| 20 | 5.8203120E-01 | 3.00029E+00  |

|    |               |              |
|----|---------------|--------------|
| 21 | 2.7857010E-01 | -1.60738E+00 |
| 22 | 1.1871710E-01 | -5.09849E-01 |
| 23 | 4.9701490E-02 | 8.16563E-01  |
| 24 | 2.0385000E-02 | -1.64995E-03 |
| D  | 16            |              |
| 1  | 1.1053090E+04 | 6.09662E-07  |
| 2  | 2.8711810E+03 | 3.35409E-06  |
| 3  | 1.0273200E+03 | 5.42909E-05  |
| 4  | 4.3276070E+02 | 1.95161E-04  |
| 5  | 2.0103890E+02 | 1.25049E-03  |
| 6  | 9.9473570E+01 | 3.18063E-03  |
| 7  | 5.1298640E+01 | 1.21360E-02  |
| 8  | 2.7084780E+01 | 1.60849E-02  |
| 9  | 1.4506110E+01 | 3.10871E-03  |
| 10 | 7.6754510E+00 | 2.87396E-01  |
| 11 | 3.9561870E+00 | 4.56815E-01  |
| 12 | 1.9833970E+00 | 3.01106E-01  |
| 13 | 9.2695730E-01 | 7.27458E-02  |
| 14 | 3.9170760E-01 | 2.90384E-03  |
| 15 | 1.5410150E-01 | 6.63832E-04  |
| 16 | 5.6087510E-02 | -8.26803E-05 |
| D  | 16            |              |
| 1  | 1.1053090E+04 | -2.24541E-07 |
| 2  | 2.8711810E+03 | -6.92986E-07 |
| 3  | 1.0273200E+03 | -1.84368E-05 |
| 4  | 4.3276070E+02 | -5.20722E-05 |
| 5  | 2.0103890E+02 | -4.11228E-04 |
| 6  | 9.9473570E+01 | -8.92770E-04 |
| 7  | 5.1298640E+01 | -4.02184E-03 |
| 8  | 2.7084780E+01 | -3.92256E-03 |
| 9  | 1.4506110E+01 | -5.03029E-03 |
| 10 | 7.6754510E+00 | -9.22699E-02 |
| 11 | 3.9561870E+00 | -1.36077E-01 |
| 12 | 1.9833970E+00 | -4.65038E-02 |
| 13 | 9.2695730E-01 | 2.08748E-01  |
| 14 | 3.9170760E-01 | 4.46696E-01  |
| 15 | 1.5410150E-01 | 4.27911E-01  |
| 16 | 5.6087510E-02 | 1.55001E-01  |
| D  | 16            |              |
| 1  | 1.1053090E+04 | -5.11310E-07 |
| 2  | 2.8711810E+03 | 6.70390E-08  |
| 3  | 1.0273200E+03 | -3.74069E-05 |
| 4  | 4.3276070E+02 | -5.85262E-05 |
| 5  | 2.0103890E+02 | -7.83102E-04 |
| 6  | 9.9473570E+01 | -1.18622E-03 |
| 7  | 5.1298640E+01 | -7.49016E-03 |
| 8  | 2.7084780E+01 | -4.57922E-03 |
| 9  | 1.4506110E+01 | -1.11603E-02 |
| 10 | 7.6754510E+00 | -1.50112E-01 |
| 11 | 3.9561870E+00 | -2.55726E-01 |
| 12 | 1.9833970E+00 | -1.00551E-01 |

|    |               |              |
|----|---------------|--------------|
| 13 | 9.2695730E-01 | 8.65086E-01  |
| 14 | 3.9170760E-01 | 1.54824E-01  |
| 15 | 1.5410150E-01 | -6.36332E-01 |
| 16 | 5.6087510E-02 | -2.51554E-01 |
| D  | 16            |              |
| 1  | 1.1053090E+04 | 3.75990E-06  |
| 2  | 2.8711810E+03 | -2.60132E-05 |
| 3  | 1.0273200E+03 | 1.99660E-04  |
| 4  | 4.3276070E+02 | -5.03343E-04 |
| 5  | 2.0103890E+02 | 3.27977E-03  |
| 6  | 9.9473570E+01 | -4.36765E-03 |
| 7  | 5.1298640E+01 | 2.80424E-02  |
| 8  | 2.7084780E+01 | -3.33955E-02 |
| 9  | 1.4506110E+01 | 1.01803E-01  |
| 10 | 7.6754510E+00 | 1.30314E-01  |
| 11 | 3.9561870E+00 | 6.39525E-01  |
| 12 | 1.9833970E+00 | -8.09463E-01 |
| 13 | 9.2695730E-01 | -6.61025E-01 |
| 14 | 3.9170760E-01 | 1.34163E+00  |
| 15 | 1.5410150E-01 | -4.18415E-01 |
| 16 | 5.6087510E-02 | -4.25157E-01 |
| D  | 16            |              |
| 1  | 1.1053090E+04 | 4.25916E-06  |
| 2  | 2.8711810E+03 | -2.70117E-05 |
| 3  | 1.0273200E+03 | 2.32205E-04  |
| 4  | 4.3276070E+02 | -4.82979E-04 |
| 5  | 2.0103890E+02 | 3.94806E-03  |
| 6  | 9.9473570E+01 | -3.90237E-03 |
| 7  | 5.1298640E+01 | 3.50552E-02  |
| 8  | 2.7084780E+01 | -3.89729E-02 |
| 9  | 1.4506110E+01 | 1.30504E-01  |
| 10 | 7.6754510E+00 | 3.74714E-01  |
| 11 | 3.9561870E+00 | 5.80465E-01  |
| 12 | 1.9833970E+00 | -2.12453E+00 |
| 13 | 9.2695730E-01 | 1.90093E+00  |
| 14 | 3.9170760E-01 | -5.52590E-01 |
| 15 | 1.5410150E-01 | -5.91624E-01 |
| 16 | 5.6087510E-02 | 7.92578E-01  |
| F  | 11            |              |
| 1  | 3.0219590E+02 | 3.92583E-04  |
| 2  | 1.0324860E+02 | 4.40720E-03  |
| 3  | 4.3730010E+01 | 3.72966E-02  |
| 4  | 2.0118100E+01 | 1.20996E-01  |
| 5  | 9.7628810E+00 | 2.23413E-01  |
| 6  | 4.7887770E+00 | 3.13922E-01  |
| 7  | 2.3145640E+00 | 3.20942E-01  |
| 8  | 1.0768650E+00 | 2.46199E-01  |
| 9  | 4.6899160E-01 | 1.26985E-01  |
| 10 | 1.9078280E-01 | 3.22680E-02  |
| 11 | 6.9253500E-02 | 1.74564E-03  |
| F  | 11            |              |

|    |               |              |
|----|---------------|--------------|
| 1  | 3.0219590E+02 | -4.13631E-04 |
| 2  | 1.0324860E+02 | -4.74911E-03 |
| 3  | 4.3730010E+01 | -4.00003E-02 |
| 4  | 2.0118100E+01 | -1.30621E-01 |
| 5  | 9.7628810E+00 | -2.34233E-01 |
| 6  | 4.7887770E+00 | -2.60296E-01 |
| 7  | 2.3145640E+00 | -8.00803E-02 |
| 8  | 1.0768650E+00 | 4.00731E-01  |
| 9  | 4.6899160E-01 | 4.53396E-01  |
| 10 | 1.9078280E-01 | 1.91477E-01  |
| 11 | 6.9253500E-02 | 2.69469E-02  |
| F  | 11            |              |
| 1  | 3.0219590E+02 | 3.20702E-04  |
| 2  | 1.0324860E+02 | 4.90352E-03  |
| 3  | 4.3730010E+01 | 3.57972E-02  |
| 4  | 2.0118100E+01 | 1.29824E-01  |
| 5  | 9.7628810E+00 | 1.95222E-01  |
| 6  | 4.7887770E+00 | 2.06222E-01  |
| 7  | 2.3145640E+00 | -2.34970E-01 |
| 8  | 1.0768650E+00 | -6.55767E-01 |
| 9  | 4.6899160E-01 | 3.54950E-01  |
| 10 | 1.9078280E-01 | 5.62386E-01  |
| 11 | 6.9253500E-02 | 1.33202E-01  |
| F  | 11            |              |
| 1  | 3.0219590E+02 | -4.21756E-04 |
| 2  | 1.0324860E+02 | -7.49303E-03 |
| 3  | 4.3730010E+01 | -5.14372E-02 |
| 4  | 2.0118100E+01 | -1.96694E-01 |
| 5  | 9.7628810E+00 | -2.58204E-01 |
| 6  | 4.7887770E+00 | -1.74682E-01 |
| 7  | 2.3145640E+00 | 9.57619E-01  |
| 8  | 1.0768650E+00 | -2.83255E-01 |
| 9  | 4.6899160E-01 | -7.53067E-01 |
| 10 | 1.9078280E-01 | 6.27149E-01  |
| 11 | 6.9253500E-02 | 2.77603E-01  |
| G  | 3             |              |
| 1  | 5.095277      | 1.000000E+00 |
| 2  | 1.309201      | 1.000000E+00 |
| 3  | 2.08E-01      | 1.000000E+00 |
| H  | 1             |              |
| 1  | 1.801534      | 1.000000E+00 |

The following basis set for Am(III) was constructed by re-contracting the cc-pVTZ-DK3 set in the presence of the ECP60MWB ECP using the procedure outlined in Ref. <sup>11</sup>.

|   |               |              |
|---|---------------|--------------|
| S | 33            |              |
| 1 | 5.6292160E+07 | 1.05308E-09  |
| 2 | 1.4983125E+07 | 6.06649E-09  |
| 3 | 5.1217092E+06 | 4.83047E-09  |
| 4 | 1.9449982E+06 | 8.41915E-08  |
| 5 | 8.1034752E+05 | -2.25535E-08 |

|    |               |              |
|----|---------------|--------------|
| 6  | 3.5799276E+05 | 7.74007E-07  |
| 7  | 1.6678096E+05 | -6.05584E-07 |
| 8  | 8.0828430E+04 | 5.61761E-06  |
| 9  | 4.0578332E+04 | -6.05969E-06 |
| 10 | 2.0958427E+04 | 3.41772E-05  |
| 11 | 1.1104413E+04 | -4.25325E-05 |
| 12 | 6.0105724E+03 | 1.77257E-04  |
| 13 | 3.3098710E+03 | -2.32261E-04 |
| 14 | 1.8445087E+03 | 7.83233E-04  |
| 15 | 1.0356408E+03 | -1.08898E-03 |
| 16 | 5.8313620E+02 | 3.20071E-03  |
| 17 | 3.3298456E+02 | -5.66761E-03 |
| 18 | 1.9220616E+02 | 1.46444E-02  |
| 19 | 1.1212845E+02 | -3.69071E-02 |
| 20 | 6.7150160E+01 | 1.14293E-01  |
| 21 | 4.0441727E+01 | -3.90767E-01 |
| 22 | 2.4492476E+01 | 9.54236E-01  |
| 23 | 1.4408020E+01 | -8.16126E-01 |
| 24 | 8.7069655E+00 | -8.35767E-01 |
| 25 | 5.3198651E+00 | 4.37052E-01  |
| 26 | 3.0565776E+00 | 8.90054E-01  |
| 27 | 1.7499853E+00 | 3.66790E-01  |
| 28 | 9.2999162E-01 | 4.09146E-02  |
| 29 | 4.9168519E-01 | 2.69875E-02  |
| 30 | 2.5123075E-01 | 6.74376E-03  |
| 31 | 7.8969540E-02 | 1.45757E-03  |
| 32 | 3.8585630E-02 | 7.61791E-04  |
| 33 | 1.8332100E-02 | 3.92298E-04  |
| S  | 33            |              |
| 1  | 5.6292160E+07 | -8.15468E-10 |
| 2  | 1.4983125E+07 | -3.38284E-09 |
| 3  | 5.1217092E+06 | -6.93203E-09 |
| 4  | 1.9449982E+06 | -4.25977E-08 |
| 5  | 8.1034752E+05 | -3.64846E-08 |
| 6  | 3.5799276E+05 | -3.60584E-07 |
| 7  | 1.6678096E+05 | -8.17416E-08 |
| 8  | 8.0828430E+04 | -2.44687E-06 |
| 9  | 4.0578332E+04 | 4.88603E-07  |
| 10 | 2.0958427E+04 | -1.41267E-05 |
| 11 | 1.1104413E+04 | 7.00668E-06  |
| 12 | 6.0105724E+03 | -7.04673E-05 |
| 13 | 3.3098710E+03 | 4.83496E-05  |
| 14 | 1.8445087E+03 | -3.03091E-04 |
| 15 | 1.0356408E+03 | 2.68083E-04  |
| 16 | 5.8313620E+02 | -1.19574E-03 |
| 17 | 3.3298456E+02 | 1.76376E-03  |
| 18 | 1.9220616E+02 | -5.39974E-03 |
| 19 | 1.1212845E+02 | 1.43476E-02  |
| 20 | 6.7150160E+01 | -5.11121E-02 |
| 21 | 4.0441727E+01 | 2.00417E-01  |
| 22 | 2.4492476E+01 | -5.44073E-01 |

|    |               |              |
|----|---------------|--------------|
| 23 | 1.4408020E+01 | 5.38329E-01  |
| 24 | 8.7069655E+00 | 4.82913E-01  |
| 25 | 5.3198651E+00 | -2.98264E-01 |
| 26 | 3.0565776E+00 | -8.92834E-01 |
| 27 | 1.7499853E+00 | -4.35200E-01 |
| 28 | 9.2999162E-01 | 4.96046E-01  |
| 29 | 4.9168519E-01 | 6.85027E-01  |
| 30 | 2.5123075E-01 | 2.08798E-01  |
| 31 | 7.8969540E-02 | 8.40394E-02  |
| 32 | 3.8585630E-02 | 9.45956E-02  |
| 33 | 1.8332100E-02 | 2.86397E-02  |
| S  | 33            |              |
| 1  | 5.6292160E+07 | 3.78611E-10  |
| 2  | 1.4983125E+07 | 1.57884E-09  |
| 3  | 5.1217092E+06 | 3.19845E-09  |
| 4  | 1.9449982E+06 | 1.99191E-08  |
| 5  | 8.1034752E+05 | 1.66012E-08  |
| 6  | 3.5799276E+05 | 1.68911E-07  |
| 7  | 1.6678096E+05 | 3.45023E-08  |
| 8  | 8.0828430E+04 | 1.14797E-06  |
| 9  | 4.0578332E+04 | -2.53108E-07 |
| 10 | 2.0958427E+04 | 6.63586E-06  |
| 11 | 1.1104413E+04 | -3.41326E-06 |
| 12 | 6.0105724E+03 | 3.31274E-05  |
| 13 | 3.3098710E+03 | -2.32275E-05 |
| 14 | 1.8445087E+03 | 1.42473E-04  |
| 15 | 1.0356408E+03 | -1.27381E-04 |
| 16 | 5.8313620E+02 | 5.60765E-04  |
| 17 | 3.3298456E+02 | -8.24913E-04 |
| 18 | 1.9220616E+02 | 2.50360E-03  |
| 19 | 1.1212845E+02 | -6.57548E-03 |
| 20 | 6.7150160E+01 | 2.32385E-02  |
| 21 | 4.0441727E+01 | -9.11770E-02 |
| 22 | 2.4492476E+01 | 2.49731E-01  |
| 23 | 1.4408020E+01 | -2.54436E-01 |
| 24 | 8.7069655E+00 | -2.10879E-01 |
| 25 | 5.3198651E+00 | 1.25393E-01  |
| 26 | 3.0565776E+00 | 4.59923E-01  |
| 27 | 1.7499853E+00 | 2.05780E-01  |
| 28 | 9.2999162E-01 | -2.72805E-01 |
| 29 | 4.9168519E-01 | -5.45049E-01 |
| 30 | 2.5123075E-01 | -2.45897E-01 |
| 31 | 7.8969540E-02 | 4.56133E-01  |
| 32 | 3.8585630E-02 | 5.86949E-01  |
| 33 | 1.8332100E-02 | 1.70916E-01  |
| S  | 33            |              |
| 1  | 5.6292160E+07 | 7.47794E-10  |
| 2  | 1.4983125E+07 | 4.21412E-09  |
| 3  | 5.1217092E+06 | 3.65754E-09  |
| 4  | 1.9449982E+06 | 5.81742E-08  |
| 5  | 8.1034752E+05 | -1.21700E-08 |

|    |               |              |
|----|---------------|--------------|
| 6  | 3.5799276E+05 | 5.32608E-07  |
| 7  | 1.6678096E+05 | -3.90749E-07 |
| 8  | 8.0828430E+04 | 3.85339E-06  |
| 9  | 4.0578332E+04 | -4.00216E-06 |
| 10 | 2.0958427E+04 | 2.33861E-05  |
| 11 | 1.1104413E+04 | -2.83194E-05 |
| 12 | 6.0105724E+03 | 1.20989E-04  |
| 13 | 3.3098710E+03 | -1.54805E-04 |
| 14 | 1.8445087E+03 | 5.31896E-04  |
| 15 | 1.0356408E+03 | -7.19307E-04 |
| 16 | 5.8313620E+02 | 2.13372E-03  |
| 17 | 3.3298456E+02 | -3.63009E-03 |
| 18 | 1.9220616E+02 | 9.15372E-03  |
| 19 | 1.1212845E+02 | -2.16243E-02 |
| 20 | 6.7150160E+01 | 6.35840E-02  |
| 21 | 4.0441727E+01 | -2.18408E-01 |
| 22 | 2.4492476E+01 | 5.79527E-01  |
| 23 | 1.4408020E+01 | -6.54827E-01 |
| 24 | 8.7069655E+00 | -2.87387E-01 |
| 25 | 5.3198651E+00 | 6.13374E-02  |
| 26 | 3.0565776E+00 | 1.59549E+00  |
| 27 | 1.7499853E+00 | -3.92912E-02 |
| 28 | 9.2999162E-01 | -1.70644E+00 |
| 29 | 4.9168519E-01 | -7.20919E-01 |
| 30 | 2.5123075E-01 | 1.66401E+00  |
| 31 | 7.8969540E-02 | 8.08079E-01  |
| 32 | 3.8585630E-02 | -9.24755E-01 |
| 33 | 1.8332100E-02 | -2.88397E-01 |
| S  | 33            |              |
| 1  | 5.6292160E+07 | -1.20118E-09 |
| 2  | 1.4983125E+07 | -4.92746E-09 |
| 3  | 5.1217092E+06 | -1.03455E-08 |
| 4  | 1.9449982E+06 | -6.17931E-08 |
| 5  | 8.1034752E+05 | -5.60167E-08 |
| 6  | 3.5799276E+05 | -5.21075E-07 |
| 7  | 1.6678096E+05 | -1.43620E-07 |
| 8  | 8.0828430E+04 | -3.52410E-06 |
| 9  | 4.0578332E+04 | 5.42455E-07  |
| 10 | 2.0958427E+04 | -2.02899E-05 |
| 11 | 1.1104413E+04 | 9.22128E-06  |
| 12 | 6.0105724E+03 | -1.00972E-04 |
| 13 | 3.3098710E+03 | 6.54011E-05  |
| 14 | 1.8445087E+03 | -4.32544E-04 |
| 15 | 1.0356408E+03 | 3.63674E-04  |
| 16 | 5.8313620E+02 | -1.68058E-03 |
| 17 | 3.3298456E+02 | 2.36441E-03  |
| 18 | 1.9220616E+02 | -7.20497E-03 |
| 19 | 1.1212845E+02 | 1.83051E-02  |
| 20 | 6.7150160E+01 | -6.40658E-02 |
| 21 | 4.0441727E+01 | 2.55968E-01  |
| 22 | 2.4492476E+01 | -7.33774E-01 |

|    |               |              |
|----|---------------|--------------|
| 23 | 1.4408020E+01 | 8.41493E-01  |
| 24 | 8.7069655E+00 | 5.37329E-01  |
| 25 | 5.3198651E+00 | -3.57440E-01 |
| 26 | 3.0565776E+00 | -2.53687E+00 |
| 27 | 1.7499853E+00 | 8.84058E-01  |
| 28 | 9.2999162E-01 | 4.30364E+00  |
| 29 | 4.9168519E-01 | -4.08330E+00 |
| 30 | 2.5123075E-01 | -1.74691E-01 |
| 31 | 7.8969540E-02 | 2.48601E+00  |
| 32 | 3.8585630E-02 | -1.18113E+00 |
| 33 | 1.8332100E-02 | -4.87779E-01 |
| S  | 33            |              |
| 1  | 5.6292160E+07 | -1.31469E-09 |
| 2  | 1.4983125E+07 | -1.06120E-08 |
| 3  | 5.1217092E+06 | 1.34038E-09  |
| 4  | 1.9449982E+06 | -1.57317E-07 |
| 5  | 8.1034752E+05 | 1.52768E-07  |
| 6  | 3.5799276E+05 | -1.51792E-06 |
| 7  | 1.6678096E+05 | 2.02754E-06  |
| 8  | 8.0828430E+04 | -1.14074E-05 |
| 9  | 4.0578332E+04 | 1.72572E-05  |
| 10 | 2.0958427E+04 | -7.10962E-05 |
| 11 | 1.1104413E+04 | 1.12579E-04  |
| 12 | 6.0105724E+03 | -3.74091E-04 |
| 13 | 3.3098710E+03 | 5.87201E-04  |
| 14 | 1.8445087E+03 | -1.65852E-03 |
| 15 | 1.0356408E+03 | 2.61035E-03  |
| 16 | 5.8313620E+02 | -6.70638E-03 |
| 17 | 3.3298456E+02 | 1.21306E-02  |
| 18 | 1.9220616E+02 | -2.81841E-02 |
| 19 | 1.1212845E+02 | 6.26936E-02  |
| 20 | 6.7150160E+01 | -1.61779E-01 |
| 21 | 4.0441727E+01 | 4.93411E-01  |
| 22 | 2.4492476E+01 | -1.29456E+00 |
| 23 | 1.4408020E+01 | 1.74483E+00  |
| 24 | 8.7069655E+00 | -3.74667E-02 |
| 25 | 5.3198651E+00 | 4.95052E-01  |
| 26 | 3.0565776E+00 | -7.45164E+00 |
| 27 | 1.7499853E+00 | 1.05539E+01  |
| 28 | 9.2999162E-01 | -3.58121E+00 |
| 29 | 4.9168519E-01 | -4.71010E+00 |
| 30 | 2.5123075E-01 | 5.59232E+00  |
| 31 | 7.8969540E-02 | -2.61646E+00 |
| 32 | 3.8585630E-02 | 1.70798E-01  |
| 33 | 1.8332100E-02 | 8.42138E-01  |
| P  | 29            |              |
| 1  | 5.4618670E+07 | 1.47383E-10  |
| 2  | 1.6477889E+07 | -7.99910E-10 |
| 3  | 5.3245498E+06 | 3.95676E-09  |
| 4  | 1.8375817E+06 | -1.34332E-08 |
| 5  | 6.6811421E+05 | 6.22674E-08  |



|    |               |              |
|----|---------------|--------------|
| 6  | 2.5396964E+05 | -1.47904E-07 |
| 7  | 1.0046027E+05 | 8.20203E-07  |
| 8  | 4.1267789E+04 | -1.09001E-06 |
| 9  | 1.7606875E+04 | 9.94547E-06  |
| 10 | 7.8134986E+03 | -3.70566E-06 |
| 11 | 3.6102128E+03 | 1.07997E-04  |
| 12 | 1.7351406E+03 | 2.57422E-05  |
| 13 | 8.6411398E+02 | 9.59908E-04  |
| 14 | 4.4372855E+02 | 4.41994E-04  |
| 15 | 2.3446224E+02 | 6.35705E-03  |
| 16 | 1.2680930E+02 | 9.86973E-04  |
| 17 | 7.0263594E+01 | 2.68426E-02  |
| 18 | 3.9388042E+01 | -2.09108E-02 |
| 19 | 2.1876140E+01 | 1.07300E-01  |
| 20 | 1.2291127E+01 | -1.33971E-01 |
| 21 | 6.8589925E+00 | -2.34596E-01 |
| 22 | 3.7470795E+00 | 6.27284E-01  |
| 23 | 2.0046380E+00 | 4.86389E-01  |
| 24 | 9.9978700E-01 | 1.39686E-01  |
| 25 | 4.9997200E-01 | 1.21387E-02  |
| 26 | 2.4206600E-01 | 1.95967E-02  |
| 27 | 9.9764000E-02 | -9.37707E-04 |
| 28 | 4.3155000E-02 | 1.23524E-03  |
| 29 | 1.8156000E-02 | -3.46994E-04 |
| P  | 29            |              |
| 1  | 5.4618670E+07 | -8.54375E-11 |
| 2  | 1.6477889E+07 | 4.49599E-10  |
| 3  | 5.3245498E+06 | -2.31552E-09 |
| 4  | 1.8375817E+06 | 7.35523E-09  |
| 5  | 6.6811421E+05 | -3.74182E-08 |
| 6  | 2.5396964E+05 | 7.50892E-08  |
| 7  | 1.0046027E+05 | -5.14940E-07 |
| 8  | 4.1267789E+04 | 4.14140E-07  |
| 9  | 1.7606875E+04 | -6.57076E-06 |
| 10 | 7.8134986E+03 | -1.34723E-06 |
| 11 | 3.6102128E+03 | -7.42997E-05 |
| 12 | 1.7351406E+03 | -5.64533E-05 |
| 13 | 8.6411398E+02 | -6.77540E-04 |
| 14 | 4.4372855E+02 | -6.08344E-04 |
| 15 | 2.3446224E+02 | -4.52075E-03 |
| 16 | 1.2680930E+02 | -2.32555E-03 |
| 17 | 7.0263594E+01 | -1.84182E-02 |
| 18 | 3.9388042E+01 | 9.36677E-03  |
| 19 | 2.1876140E+01 | -7.25248E-02 |
| 20 | 1.2291127E+01 | 1.16635E-01  |
| 21 | 6.8589925E+00 | 6.24345E-02  |
| 22 | 3.7470795E+00 | -4.68272E-01 |
| 23 | 2.0046380E+00 | -3.22843E-01 |
| 24 | 9.9978700E-01 | 2.35076E-01  |
| 25 | 4.9997200E-01 | 5.92112E-01  |
| 26 | 2.4206600E-01 | 3.47833E-01  |

|    |               |              |
|----|---------------|--------------|
| 27 | 9.9764000E-02 | 5.69877E-02  |
| 28 | 4.3155000E-02 | -3.10056E-03 |
| 29 | 1.8156000E-02 | 1.64517E-03  |
| P  | 29            |              |
| 1  | 5.4618670E+07 | 2.06148E-11  |
| 2  | 1.6477889E+07 | -1.07513E-10 |
| 3  | 5.3245498E+06 | 5.60206E-10  |
| 4  | 1.8375817E+06 | -1.74481E-09 |
| 5  | 6.6811421E+05 | 9.11910E-09  |
| 6  | 2.5396964E+05 | -1.73842E-08 |
| 7  | 1.0046027E+05 | 1.26964E-07  |
| 8  | 4.1267789E+04 | -8.49171E-08 |
| 9  | 1.7606875E+04 | 1.64087E-06  |
| 10 | 7.8134986E+03 | 5.65973E-07  |
| 11 | 3.6102128E+03 | 1.87324E-05  |
| 12 | 1.7351406E+03 | 1.64830E-05  |
| 13 | 8.6411398E+02 | 1.71809E-04  |
| 14 | 4.4372855E+02 | 1.71034E-04  |
| 15 | 2.3446224E+02 | 1.14811E-03  |
| 16 | 1.2680930E+02 | 6.81770E-04  |
| 17 | 7.0263594E+01 | 4.63860E-03  |
| 18 | 3.9388042E+01 | -2.06623E-03 |
| 19 | 2.1876140E+01 | 1.81473E-02  |
| 20 | 1.2291127E+01 | -3.02314E-02 |
| 21 | 6.8589925E+00 | -1.19495E-02 |
| 22 | 3.7470795E+00 | 1.21440E-01  |
| 23 | 2.0046380E+00 | 8.11005E-02  |
| 24 | 9.9978700E-01 | -8.37532E-02 |
| 25 | 4.9997200E-01 | -2.04744E-01 |
| 26 | 2.4206600E-01 | -1.60217E-01 |
| 27 | 9.9764000E-02 | 1.99954E-01  |
| 28 | 4.3155000E-02 | 6.21318E-01  |
| 29 | 1.8156000E-02 | 3.35737E-01  |
| P  | 29            |              |
| 1  | 5.4618670E+07 | 6.68641E-11  |
| 2  | 1.6477889E+07 | -3.46616E-10 |
| 3  | 5.3245498E+06 | 1.82027E-09  |
| 4  | 1.8375817E+06 | -5.59560E-09 |
| 5  | 6.6811421E+05 | 2.97755E-08  |
| 6  | 2.5396964E+05 | -5.48021E-08 |
| 7  | 1.0046027E+05 | 4.17661E-07  |
| 8  | 4.1267789E+04 | -2.42985E-07 |
| 9  | 1.7606875E+04 | 5.44096E-06  |
| 10 | 7.8134986E+03 | 2.36052E-06  |
| 11 | 3.6102128E+03 | 6.24673E-05  |
| 12 | 1.7351406E+03 | 5.97249E-05  |
| 13 | 8.6411398E+02 | 5.74936E-04  |
| 14 | 4.4372855E+02 | 6.07362E-04  |
| 15 | 2.3446224E+02 | 3.84736E-03  |
| 16 | 1.2680930E+02 | 2.46104E-03  |
| 17 | 7.0263594E+01 | 1.55199E-02  |

|    |               |              |
|----|---------------|--------------|
| 18 | 3.9388042E+01 | -6.63759E-03 |
| 19 | 2.1876140E+01 | 6.21917E-02  |
| 20 | 1.2291127E+01 | -1.08834E-01 |
| 21 | 6.8589925E+00 | -2.86222E-02 |
| 22 | 3.7470795E+00 | 4.29717E-01  |
| 23 | 2.0046380E+00 | 3.08810E-01  |
| 24 | 9.9978700E-01 | -6.70268E-01 |
| 25 | 4.9997200E-01 | -5.21875E-01 |
| 26 | 2.4206600E-01 | 3.97063E-01  |
| 27 | 9.9764000E-02 | 6.44214E-01  |
| 28 | 4.3155000E-02 | 1.90093E-01  |
| 29 | 1.8156000E-02 | 3.76205E-03  |
| P  | 29            |              |
| 1  | 5.4618670E+07 | 6.64365E-11  |
| 2  | 1.6477889E+07 | -3.15129E-10 |
| 3  | 5.3245498E+06 | 1.85371E-09  |
| 4  | 1.8375817E+06 | -4.66338E-09 |
| 5  | 6.6811421E+05 | 3.23242E-08  |
| 6  | 2.5396964E+05 | -3.23514E-08 |
| 7  | 1.0046027E+05 | 4.96770E-07  |
| 8  | 4.1267789E+04 | 2.10555E-07  |
| 9  | 1.7606875E+04 | 7.07329E-06  |
| 10 | 7.8134986E+03 | 9.60928E-06  |
| 11 | 3.6102128E+03 | 8.62302E-05  |
| 12 | 1.7351406E+03 | 1.45528E-04  |
| 13 | 8.6411398E+02 | 8.21235E-04  |
| 14 | 4.4372855E+02 | 1.32863E-03  |
| 15 | 2.3446224E+02 | 5.54645E-03  |
| 16 | 1.2680930E+02 | 5.94948E-03  |
| 17 | 7.0263594E+01 | 2.15634E-02  |
| 18 | 3.9388042E+01 | -2.85199E-03 |
| 19 | 2.1876140E+01 | 8.88106E-02  |
| 20 | 1.2291127E+01 | -1.71583E-01 |
| 21 | 6.8589925E+00 | -2.39963E-02 |
| 22 | 3.7470795E+00 | 8.07814E-01  |
| 23 | 2.0046380E+00 | 2.35566E-01  |
| 24 | 9.9978700E-01 | -1.72865E+00 |
| 25 | 4.9997200E-01 | 4.62243E-01  |
| 26 | 2.4206600E-01 | 1.31407E+00  |
| 27 | 9.9764000E-02 | -6.96803E-01 |
| 28 | 4.3155000E-02 | -4.62068E-01 |
| 29 | 1.8156000E-02 | 8.97340E-03  |
| P  | 29            |              |
| 1  | 5.4618670E+07 | -2.20188E-10 |
| 2  | 1.6477889E+07 | 1.42243E-09  |
| 3  | 5.3245498E+06 | -5.55846E-09 |
| 4  | 1.8375817E+06 | 2.70322E-08  |
| 5  | 6.6811421E+05 | -7.16823E-08 |
| 6  | 2.5396964E+05 | 3.92702E-07  |
| 7  | 1.0046027E+05 | -5.88561E-07 |
| 8  | 4.1267789E+04 | 5.14028E-06  |

|    |               |              |
|----|---------------|--------------|
| 9  | 1.7606875E+04 | -1.87136E-06 |
| 10 | 7.8134986E+03 | 6.19081E-05  |
| 11 | 3.6102128E+03 | 2.70815E-05  |
| 12 | 1.7351406E+03 | 6.29656E-04  |
| 13 | 8.6411398E+02 | 5.13020E-04  |
| 14 | 4.4372855E+02 | 4.95409E-03  |
| 15 | 2.3446224E+02 | 3.88827E-03  |
| 16 | 1.2680930E+02 | 2.55042E-02  |
| 17 | 7.0263594E+01 | 7.46952E-03  |
| 18 | 3.9388042E+01 | 5.98408E-02  |
| 19 | 2.1876140E+01 | 3.58593E-02  |
| 20 | 1.2291127E+01 | -1.31465E-01 |
| 21 | 6.8589925E+00 | -1.79060E-01 |
| 22 | 3.7470795E+00 | 2.21134E+00  |
| 23 | 2.0046380E+00 | -2.23959E+00 |
| 24 | 9.9978700E-01 | -9.54654E-01 |
| 25 | 4.9997200E-01 | 3.29699E+00  |
| 26 | 2.4206600E-01 | -2.30031E+00 |
| 27 | 9.9764000E-02 | 4.23798E-02  |
| 28 | 4.3155000E-02 | 6.84868E-01  |
| 29 | 1.8156000E-02 | -3.00921E-02 |
| D  | 2.000000E+01  |              |
| 1  | 1.2260514E+05 | -9.21291E-09 |
| 2  | 2.8764076E+04 | 1.02699E-07  |
| 3  | 9.2733196E+03 | -4.43193E-07 |
| 4  | 3.5765898E+03 | 3.31462E-06  |
| 5  | 1.5572799E+03 | -5.55689E-06 |
| 6  | 7.3850180E+02 | 5.38734E-05  |
| 7  | 3.7201662E+02 | -1.85554E-05 |
| 8  | 1.9609261E+02 | 5.60674E-04  |
| 9  | 1.0647837E+02 | 1.96355E-04  |
| 10 | 5.9214914E+01 | 3.75916E-03  |
| 11 | 3.3142124E+01 | 8.24353E-04  |
| 12 | 1.8355967E+01 | 2.82117E-02  |
| 13 | 1.0228860E+01 | -1.12953E-01 |
| 14 | 5.6212585E+00 | 2.03166E-01  |
| 15 | 3.0041933E+00 | 5.16349E-01  |
| 16 | 1.5539126E+00 | 3.51533E-01  |
| 17 | 7.5505798E-01 | 9.33844E-02  |
| 18 | 3.2519923E-01 | 3.96772E-03  |
| 19 | 1.3082626E-01 | 8.07794E-04  |
| 20 | 4.9184900E-02 | -2.10760E-04 |
| D  | 20            |              |
| 1  | 1.2260514E+05 | 1.23940E-09  |
| 2  | 2.8764076E+04 | -1.71073E-08 |
| 3  | 9.2733196E+03 | 4.32339E-08  |
| 4  | 3.5765898E+03 | -6.42452E-07 |
| 5  | 1.5572799E+03 | -7.51176E-08 |
| 6  | 7.3850180E+02 | -1.20382E-05 |
| 7  | 3.7201662E+02 | -1.42227E-05 |
| 8  | 1.9609261E+02 | -1.40499E-04 |

|    |               |              |
|----|---------------|--------------|
| 9  | 1.0647837E+02 | -2.12494E-04 |
| 10 | 5.9214914E+01 | -9.87048E-04 |
| 11 | 3.3142124E+01 | -1.12281E-03 |
| 12 | 1.8355967E+01 | -7.58698E-03 |
| 13 | 1.0228860E+01 | 3.56060E-02  |
| 14 | 5.6212585E+00 | -8.20403E-02 |
| 15 | 3.0041933E+00 | -1.81801E-01 |
| 16 | 1.5539126E+00 | -8.77519E-02 |
| 17 | 7.5505798E-01 | 1.97837E-01  |
| 18 | 3.2519923E-01 | 4.53612E-01  |
| 19 | 1.3082626E-01 | 4.28968E-01  |
| 20 | 4.9184900E-02 | 1.62621E-01  |
| D  | 20            |              |
| 1  | 1.2260514E+05 | -7.74521E-09 |
| 2  | 2.8764076E+04 | 6.32292E-08  |
| 3  | 9.2733196E+03 | -4.89469E-07 |
| 4  | 3.5765898E+03 | 1.42188E-06  |
| 5  | 1.5572799E+03 | -1.05610E-05 |
| 6  | 7.3850180E+02 | 1.18469E-05  |
| 7  | 3.7201662E+02 | -1.33578E-04 |
| 8  | 1.9609261E+02 | 1.14166E-05  |
| 9  | 1.0647837E+02 | -1.11790E-03 |
| 10 | 5.9214914E+01 | -3.50058E-04 |
| 11 | 3.3142124E+01 | -5.53030E-03 |
| 12 | 1.8355967E+01 | -7.63359E-03 |
| 13 | 1.0228860E+01 | 5.61330E-02  |
| 14 | 5.6212585E+00 | -1.45160E-01 |
| 15 | 3.0041933E+00 | -3.87993E-01 |
| 16 | 1.5539126E+00 | -1.32739E-01 |
| 17 | 7.5505798E-01 | 9.36297E-01  |
| 18 | 3.2519923E-01 | 1.43642E-01  |
| 19 | 1.3082626E-01 | -6.34433E-01 |
| 20 | 4.9184900E-02 | -2.37128E-01 |
| D  | 20            |              |
| 1  | 1.2260514E+05 | 1.49405E-07  |
| 2  | 2.8764076E+04 | -1.40220E-06 |
| 3  | 9.2733196E+03 | 8.49709E-06  |
| 4  | 3.5765898E+03 | -3.80234E-05 |
| 5  | 1.5572799E+03 | 1.55641E-04  |
| 6  | 7.3850180E+02 | -4.88622E-04 |
| 7  | 3.7201662E+02 | 1.61784E-03  |
| 8  | 1.9609261E+02 | -3.80220E-03 |
| 9  | 1.0647837E+02 | 1.09885E-02  |
| 10 | 5.9214914E+01 | -1.98915E-02 |
| 11 | 3.3142124E+01 | 5.04363E-02  |
| 12 | 1.8355967E+01 | -7.14950E-02 |
| 13 | 1.0228860E+01 | 5.81181E-02  |
| 14 | 5.6212585E+00 | 2.28475E-02  |
| 15 | 3.0041933E+00 | 1.09192E+00  |
| 16 | 1.5539126E+00 | -1.18406E+00 |
| 17 | 7.5505798E-01 | -5.32669E-01 |

|    |               |              |
|----|---------------|--------------|
| 18 | 3.2519923E-01 | 1.39446E+00  |
| 19 | 1.3082626E-01 | -5.31896E-01 |
| 20 | 4.9184900E-02 | -3.51929E-01 |
| D  | 20            |              |
| 1  | 1.2260514E+05 | 7.52509E-08  |
| 2  | 2.8764076E+04 | -6.91409E-07 |
| 3  | 9.2733196E+03 | 4.33368E-06  |
| 4  | 3.5765898E+03 | -1.80976E-05 |
| 5  | 1.5572799E+03 | 8.07774E-05  |
| 6  | 7.3850180E+02 | -2.21581E-04 |
| 7  | 3.7201662E+02 | 8.79732E-04  |
| 8  | 1.9609261E+02 | -1.63565E-03 |
| 9  | 1.0647837E+02 | 6.51045E-03  |
| 10 | 5.9214914E+01 | -8.85295E-03 |
| 11 | 3.3142124E+01 | 3.42648E-02  |
| 12 | 1.8355967E+01 | -3.36142E-02 |
| 13 | 1.0228860E+01 | -6.00405E-02 |
| 14 | 5.6212585E+00 | 4.07707E-01  |
| 15 | 3.0041933E+00 | 1.07526E+00  |
| 16 | 1.5539126E+00 | -2.84362E+00 |
| 17 | 7.5505798E-01 | 2.52407E+00  |
| 18 | 3.2519923E-01 | -9.44330E-01 |
| 19 | 1.3082626E-01 | -4.19834E-01 |
| 20 | 4.9184900E-02 | 7.54450E-01  |
| F  | 13            |              |
| 1  | 1.1664753E+03 | -5.82198E-07 |
| 2  | 3.9242232E+02 | 2.47412E-05  |
| 3  | 1.6616422E+02 | 6.60030E-05  |
| 4  | 7.8013407E+01 | 8.60141E-04  |
| 5  | 3.8855696E+01 | 2.71694E-03  |
| 6  | 1.9750591E+01 | 1.31660E-02  |
| 7  | 1.0197502E+01 | 2.29065E-02  |
| 8  | 5.2790447E+00 | 1.57996E-01  |
| 9  | 2.6864586E+00 | 3.36239E-01  |
| 10 | 1.3377135E+00 | 3.57800E-01  |
| 11 | 6.3872673E-01 | 2.70242E-01  |
| 12 | 2.8613327E-01 | 1.32916E-01  |
| 13 | 1.1398101E-01 | 3.19534E-02  |
| F  | 13            |              |
| 1  | 1.1664753E+03 | -2.21665E-06 |
| 2  | 3.9242232E+02 | -1.07723E-05 |
| 3  | 1.6616422E+02 | -1.71760E-04 |
| 4  | 7.8013407E+01 | -7.61633E-04 |
| 5  | 3.8855696E+01 | -4.34498E-03 |
| 6  | 1.9750591E+01 | -1.39317E-02 |
| 7  | 1.0197502E+01 | -3.61143E-02 |
| 8  | 5.2790447E+00 | -2.01422E-01 |
| 9  | 2.6864586E+00 | -3.85592E-01 |
| 10 | 1.3377135E+00 | -1.39362E-01 |
| 11 | 6.3872673E-01 | 4.20366E-01  |
| 12 | 2.8613327E-01 | 4.57391E-01  |

|    |               |              |
|----|---------------|--------------|
| 13 | 1.1398101E-01 | 1.88996E-01  |
| F  | 13            |              |
| 1  | 1.1664753E+03 | 1.11890E-05  |
| 2  | 3.9242232E+02 | -4.60261E-05 |
| 3  | 1.6616422E+02 | 4.63349E-04  |
| 4  | 7.8013407E+01 | -2.16965E-05 |
| 5  | 3.8855696E+01 | 7.82615E-03  |
| 6  | 1.9750591E+01 | 8.88371E-03  |
| 7  | 1.0197502E+01 | 6.09089E-02  |
| 8  | 5.2790447E+00 | 2.11571E-01  |
| 9  | 2.6864586E+00 | 5.36344E-01  |
| 10 | 1.3377135E+00 | -5.46283E-01 |
| 11 | 6.3872673E-01 | -6.01100E-01 |
| 12 | 2.8613327E-01 | 5.36313E-01  |
| 13 | 1.1398101E-01 | 4.50855E-01  |
| F  | 13            |              |
| 1  | 1.1664753E+03 | 6.53586E-06  |
| 2  | 3.9242232E+02 | -8.09430E-05 |
| 3  | 1.6616422E+02 | 4.48488E-05  |
| 4  | 7.8013407E+01 | -2.05959E-03 |
| 5  | 3.8855696E+01 | -3.60984E-03 |
| 6  | 1.9750591E+01 | -2.49570E-02 |
| 7  | 1.0197502E+01 | -3.90996E-02 |
| 8  | 5.2790447E+00 | -3.61246E-01 |
| 9  | 2.6864586E+00 | -4.50388E-01 |
| 10 | 1.3377135E+00 | 1.48293E+00  |
| 11 | 6.3872673E-01 | -9.44293E-01 |
| 12 | 2.8613327E-01 | -3.71526E-01 |
| 13 | 1.1398101E-01 | 8.08517E-01  |
| G  | 3             |              |
| 1  | 2.971818E+00  | 1.000000E+00 |
| 2  | 9.632869E-01  | 1.000000E+00 |
| 3  | 2.231343E-01  | 1.000000E+00 |
| H  | 1             |              |
| 1  | 1.446907E+00  | 1.000000E+00 |

### E. Cartesian Spatial Coordinates for all Optimized Structures

All coordinates are provided in Angstroms.

|    |                                                                |    |                                                                |
|----|----------------------------------------------------------------|----|----------------------------------------------------------------|
| 16 | Eu(H <sub>2</sub> PO <sub>2</sub> ) <sub>3</sub> RI-MP2 SC ECP | 16 | Am(H <sub>2</sub> PO <sub>2</sub> ) <sub>3</sub> RI-MP2 SC ECP |
| Eu | -0.038382 -0.051961 -0.009571                                  | Am | 0.077422 -0.136904 0.067323                                    |
| O  | -0.637128 -1.981527 1.148478                                   | O  | -0.686534 -2.131767 1.121543                                   |
| O  | -1.462073 -1.538949 -1.160293                                  | O  | -1.543078 -1.436308 -1.110589                                  |
| P  | -1.479021 -2.553891 -0.006136                                  | P  | -1.637791 -2.520887 -0.024578                                  |
| H  | -2.786449 -2.834665 0.413098                                   | H  | -2.953050 -2.668259 0.435670                                   |
| H  | -0.985267 -3.799457 -0.420051                                  | H  | -1.317088 -3.786608 -0.535694                                  |
| O  | 1.917842 0.618068 1.048176                                     | O  | 2.078236 0.545737 1.167646                                     |
| O  | 1.985941 -0.618650 -1.111031                                   | O  | 2.167545 -0.451196 -1.122365                                   |
| P  | 2.854055 0.048826 -0.034518                                    | P  | 3.012800 0.152812 0.006789                                     |

|                                                                       |                                                                       |
|-----------------------------------------------------------------------|-----------------------------------------------------------------------|
| H 3.772690 -0.854650 0.517376                                         | H 4.000820 -0.742021 0.440939                                         |
| H 3.663714 1.058542 -0.571778                                         | H 3.744896 1.262454 -0.438355                                         |
| O -1.485184 1.432029 1.123625                                         | O -1.299413 1.459112 1.216889                                         |
| O -0.463052 1.979408 -1.085773                                        | O -0.574422 1.791225 -1.155245                                        |
| P -1.367640 2.513020 0.039576                                         | P -1.396415 2.391906 0.000226                                         |
| H -0.860909 3.710600 0.563889                                         | H -0.943942 3.681276 0.315245                                         |
| H -2.629136 2.873256 -0.455068                                        | H -2.729984 2.589430 -0.385448                                        |
| 16<br>Eu(H <sub>2</sub> PS <sub>2</sub> ) <sub>3</sub> RI-MP2 SC ECP  | 16<br>Am(H <sub>2</sub> PS <sub>2</sub> ) <sub>3</sub> RI-MP2 SC ECP  |
| Eu 0.086553 -0.033594 -0.087550                                       | Am 0.158549 -0.068694 -0.044570                                       |
| S -2.210842 1.424245 -0.469741                                        | S -2.172202 1.389818 -0.402697                                        |
| S -1.470185 -1.682268 -1.657173                                       | S -1.447748 -1.714847 -1.627284                                       |
| P -2.837694 -0.232441 -1.425836                                       | P -2.799691 -0.254717 -1.384276                                       |
| H -3.366399 0.113378 -2.678582                                        | H -3.316748 0.116520 -2.634888                                        |
| H -3.969371 -0.744168 -0.772133                                       | H -3.942052 -0.757960 -0.742747                                       |
| S 0.748673 1.486853 2.111223                                          | S 0.757025 1.472389 2.211218                                          |
| S -0.635876 -1.604229 2.045531                                        | S -0.652047 -1.613470 2.110907                                        |
| P -0.110137 -0.005192 3.143561                                        | P -0.194266 0.013359 3.203028                                         |
| H -1.230256 0.473297 3.840640                                         | H -1.366817 0.514461 3.789543                                         |
| H 0.729193 -0.402953 4.195008                                         | H 0.546051 -0.368178 4.332000                                         |
| S 1.531774 1.703363 -1.666272                                         | S 1.567501 1.720532 -1.650545                                         |
| S 2.375748 -1.446276 -0.649819                                        | S 2.451789 -1.458136 -0.793166                                        |
| P 2.917300 0.251802 -1.586415                                         | P 2.948576 0.266326 -1.703142                                         |
| H 4.091388 0.748403 -0.999813                                         | H 4.158258 0.739061 -1.173084                                         |
| H 3.350132 -0.050221 -2.886541                                        | H 3.303823 0.003538 -3.034215                                         |
| 16<br>Eu(H <sub>2</sub> PSe <sub>2</sub> ) <sub>3</sub> RI-MP2 SC ECP | 16<br>Am(H <sub>2</sub> PSe <sub>2</sub> ) <sub>3</sub> RI-MP2 SC ECP |
| Eu 0.284129 0.093545 -0.254897                                        | Am -0.273618 -0.146991 -0.297041                                      |
| Se -2.227529 1.492928 -0.014710                                       | Se -2.507919 1.586100 -0.801702                                       |
| Se -1.366248 -1.363840 -2.099830                                      | Se -1.993847 -1.947055 -1.782866                                      |
| P -2.877617 -0.334146 -0.957360                                       | P -3.258141 -0.201861 -1.750570                                       |
| H -3.989594 -0.088824 -1.776999                                       | H -3.646615 0.099067 -3.064178                                        |
| H -3.410600 -1.204645 0.005250                                        | H -4.488378 -0.534863 -1.165976                                       |
| Se 0.908520 1.543509 2.136380                                         | Se 0.699651 1.724000 1.715965                                         |
| Se -0.703278 -1.701219 1.763242                                       | Se -0.851785 -1.569695 2.143938                                       |
| P -0.445912 0.078353 2.942762                                         | P 0.470418 -0.046337 2.912589                                         |
| H -1.696834 0.666213 3.180683                                         | H 0.047149 0.313769 4.201095                                          |
| H -0.040653 -0.277858 4.238220                                        | H 1.728223 -0.612396 3.167314                                         |
| Se 1.918175 1.958339 -1.687474                                        | Se 1.428478 1.301413 -2.154754                                        |
| Se 2.467605 -1.616394 -0.916569                                       | Se 2.268159 -1.508128 0.022945                                        |
| P 3.193437 0.220532 -1.779392                                         | P 2.913484 0.305039 -0.950071                                         |
| H 4.434096 0.534403 -1.206255                                         | H 3.424757 1.199708 0.001333                                          |
| H 3.552308 -0.000891 -3.116962                                        | H 4.039983 0.038232 -1.741935                                         |
| 16<br>Eu(H <sub>2</sub> PTe <sub>2</sub> ) <sub>3</sub> RI-MP2 SC ECP | 16<br>Am(H <sub>2</sub> PTe <sub>2</sub> ) <sub>3</sub> RI-MP2 SC ECP |
| Eu 0.096011 0.001077 0.451788                                         | Am 0.004459 0.030401 -0.546051                                        |
| Te -2.685391 1.209750 -0.008637                                       | Te -2.456750 1.815420 -1.150019                                       |
| Te -0.846931 -1.892720 -1.798449                                      | Te -1.768205 -2.110965 -1.951291                                      |
| P -2.360803 -0.057871 -2.003976                                       | P -3.323813 -0.400615 -1.359318                                       |
| H -1.905920 0.792059 -3.027632                                        | H -4.385665 -0.399829 -2.278303                                       |
| H -3.595591 -0.482135 -2.526154                                       | H -3.986891 -0.764002 -0.174630                                       |



|    |           |           |           |    |           |           |           |
|----|-----------|-----------|-----------|----|-----------|-----------|-----------|
| Te | 0.398325  | 1.997233  | 2.754174  | Te | 1.250765  | 1.520483  | 1.823915  |
| Te | -0.251400 | -2.051925 | 2.680104  | Te | -1.222380 | -1.575142 | 1.784262  |
| P  | -0.163591 | -0.011085 | 3.915545  | P  | -0.011062 | -0.028435 | 3.152472  |
| H  | -1.380157 | 0.168836  | 4.591701  | H  | -0.858747 | 0.666476  | 4.032774  |
| H  | 0.710929  | -0.170287 | 5.001654  | H  | 0.804629  | -0.701006 | 4.078919  |
| Te | 0.997611  | 1.930299  | -1.769052 | Te | 1.822767  | 2.213949  | -1.847965 |
| Te | 2.841702  | -1.247883 | -0.091101 | Te | 2.420356  | -1.792313 | -1.133526 |
| P  | 2.469998  | 0.067698  | -2.047342 | P  | 3.318664  | 0.412818  | -1.379528 |
| H  | 3.697614  | 0.493260  | -2.584114 | H  | 4.069920  | 0.725761  | -0.234217 |
| H  | 1.977593  | -0.746306 | -3.082421 | H  | 4.321950  | 0.386998  | -2.361407 |

|    |                                                                |           |           |    |                                                                |           |           |
|----|----------------------------------------------------------------|-----------|-----------|----|----------------------------------------------------------------|-----------|-----------|
| 16 | Eu(H <sub>2</sub> PO <sub>2</sub> ) <sub>3</sub> B3LYP SC ECP  |           |           | 16 | Am(H <sub>2</sub> PO <sub>2</sub> ) <sub>3</sub> B3LYP SC ECP  |           |           |
| Eu | 0.005022                                                       | -0.000030 | -0.000040 | Am | -0.000364                                                      | 0.000000  | 0.000000  |
| O  | -0.506674                                                      | -2.053317 | 1.091782  | O  | -0.500604                                                      | -2.113942 | 1.078320  |
| O  | -1.527322                                                      | -1.466775 | -1.098811 | O  | -1.581501                                                      | -1.490397 | -1.079902 |
| P  | -1.470563                                                      | -2.538556 | -0.001000 | P  | -1.488845                                                      | -2.579485 | -0.001124 |
| H  | -2.752400                                                      | -2.799062 | 0.529287  | H  | -2.755683                                                      | -2.855514 | 0.555092  |
| H  | -1.065243                                                      | -3.785217 | -0.523586 | H  | -1.093107                                                      | -3.813630 | -0.558222 |
| O  | 2.038241                                                       | 0.583580  | 1.098231  | O  | 2.080802                                                       | 0.630125  | 1.075447  |
| O  | 2.038294                                                       | -0.583545 | -1.098245 | O  | 2.080802                                                       | -0.630125 | -1.075447 |
| P  | 2.939490                                                       | 0.000037  | 0.000005  | P  | 2.978073                                                       | -0.000000 | 0.000000  |
| H  | 3.811567                                                       | -0.978968 | 0.522875  | H  | 3.850084                                                       | -0.956041 | 0.562486  |
| H  | 3.811540                                                       | 0.979077  | -0.522844 | H  | 3.850084                                                       | 0.956041  | -0.562486 |
| O  | -1.527300                                                      | 1.466713  | 1.098782  | O  | -1.581501                                                      | 1.490397  | 1.079902  |
| O  | -0.506665                                                      | 2.053278  | -1.091811 | O  | -0.500604                                                      | 2.113942  | -1.078320 |
| P  | -1.470514                                                      | 2.538526  | 0.001005  | P  | -1.488846                                                      | 2.579485  | 0.001124  |
| H  | -1.065125                                                      | 3.785151  | 0.523621  | H  | -1.093107                                                      | 3.813630  | 0.558222  |
| H  | -2.752347                                                      | 2.799109  | -0.529252 | H  | -2.755683                                                      | 2.855513  | -0.555092 |
| 16 | Eu(H <sub>2</sub> PS <sub>2</sub> ) <sub>3</sub> B3LYP SC ECP  |           |           | 16 | Am(H <sub>2</sub> PS <sub>2</sub> ) <sub>3</sub> B3LYP SC ECP  |           |           |
| Eu | 0.000000                                                       | -0.000000 | 0.027504  | Am | -0.000000                                                      | 0.000000  | 0.008395  |
| S  | -2.507687                                                      | 1.303936  | -0.407830 | S  | -2.514121                                                      | 1.309787  | -0.409805 |
| S  | -1.466112                                                      | -1.620725 | -1.824270 | S  | -1.480706                                                      | -1.612402 | -1.844742 |
| P  | -2.925949                                                      | -0.228032 | -1.663741 | P  | -2.946184                                                      | -0.228547 | -1.653673 |
| H  | -3.259746                                                      | 0.274581  | -2.939431 | H  | -3.309217                                                      | 0.266211  | -2.924591 |
| H  | -4.139071                                                      | -0.842258 | -1.286430 | H  | -4.146963                                                      | -0.849427 | -1.247981 |
| S  | 0.674734                                                       | 1.568542  | 2.323562  | S  | 0.681889                                                       | 1.566985  | 2.312023  |
| S  | -0.674734                                                      | -1.568542 | 2.323562  | S  | -0.681889                                                      | -1.566985 | 2.312023  |
| P  | 0.000000                                                       | -0.000000 | 3.411117  | P  | 0.000000                                                       | 0.000000  | 3.398037  |
| H  | -1.001238                                                      | 0.432550  | 4.306872  | H  | -1.001117                                                      | 0.433977  | 4.293595  |
| H  | 1.001239                                                       | -0.432550 | 4.306872  | H  | 1.001118                                                       | -0.433977 | 4.293595  |
| S  | 1.466112                                                       | 1.620725  | -1.824270 | S  | 1.480706                                                       | 1.612403  | -1.844742 |
| S  | 2.507688                                                       | -1.303936 | -0.407830 | S  | 2.514120                                                       | -1.309787 | -0.409804 |
| P  | 2.925949                                                       | 0.228032  | -1.663740 | P  | 2.946184                                                       | 0.228547  | -1.653673 |
| H  | 4.139071                                                       | 0.842258  | -1.286430 | H  | 4.146964                                                       | 0.849426  | -1.247982 |
| H  | 3.259746                                                       | -0.274581 | -2.939430 | H  | 3.309216                                                       | -0.266211 | -2.924591 |
| 16 | Eu(H <sub>2</sub> PSe <sub>2</sub> ) <sub>3</sub> B3LYP SC ECP |           |           | 16 | Am(H <sub>2</sub> PSe <sub>2</sub> ) <sub>3</sub> B3LYP SC ECP |           |           |
| Eu | -0.001095                                                      | -0.000908 | 0.049243  | Am | 0.000000                                                       | -0.000000 | 0.011233  |

|                                                                      |           |           |           |                                                                      |           |           |           |
|----------------------------------------------------------------------|-----------|-----------|-----------|----------------------------------------------------------------------|-----------|-----------|-----------|
| Se                                                                   | -2.637069 | 1.397894  | -0.368251 | Se                                                                   | -2.611415 | 1.424561  | -0.385526 |
| Se                                                                   | -1.467156 | -1.738304 | -1.935994 | Se                                                                   | -1.492774 | -1.739122 | -1.934091 |
| P                                                                    | -3.041520 | -0.236764 | -1.760938 | P                                                                    | -3.067273 | -0.239728 | -1.725746 |
| H                                                                    | -3.351104 | 0.288945  | -3.032934 | H                                                                    | -3.430179 | 0.251355  | -2.997332 |
| H                                                                    | -4.262730 | -0.858475 | -1.426505 | H                                                                    | -4.271421 | -0.855898 | -1.325781 |
| Se                                                                   | 0.761352  | 1.685832  | 2.431653  | Se                                                                   | 0.744145  | 1.692616  | 2.378722  |
| Se                                                                   | -0.760518 | -1.685581 | 2.434294  | Se                                                                   | -0.744144 | -1.692616 | 2.378722  |
| P                                                                    | 0.001296  | 0.000615  | 3.594798  | P                                                                    | -0.000000 | -0.000000 | 3.542352  |
| H                                                                    | -0.988545 | 0.451073  | 4.493468  | H                                                                    | -0.996793 | 0.434899  | 4.441004  |
| H                                                                    | 0.992417  | -0.449005 | 4.492481  | H                                                                    | 0.996793  | -0.434898 | 4.441005  |
| Se                                                                   | 1.467673  | 1.739612  | -1.932584 | Se                                                                   | 1.492774  | 1.739122  | -1.934092 |
| Se                                                                   | 2.633713  | -1.400555 | -0.369685 | Se                                                                   | 2.611415  | -1.424562 | -0.385527 |
| P                                                                    | 3.040534  | 0.236437  | -1.758936 | P                                                                    | 3.067274  | 0.239727  | -1.725747 |
| H                                                                    | 4.262048  | 0.856417  | -1.422395 | H                                                                    | 4.271421  | 0.855897  | -1.325782 |
| H                                                                    | 3.350705  | -0.287233 | -3.031630 | H                                                                    | 3.430178  | -0.251356 | -2.997332 |
| 16<br>Eu(H <sub>2</sub> PTe <sub>2</sub> ) <sub>3</sub> B3LYP SC ECP |           |           |           | 16<br>Am(H <sub>2</sub> PTe <sub>2</sub> ) <sub>3</sub> B3LYP SC ECP |           |           |           |
| Eu                                                                   | 0.005126  | 0.001067  | -0.035527 | Am                                                                   | 0.000000  | -0.000000 | 0.003070  |
| Te                                                                   | -2.852638 | 1.561691  | -0.290529 | Te                                                                   | -2.781387 | 1.589352  | -0.351828 |
| Te                                                                   | -1.596585 | -1.876748 | -2.200827 | Te                                                                   | -1.538308 | -1.914978 | -2.097158 |
| P                                                                    | -3.365237 | -0.257083 | -1.824041 | P                                                                    | -3.297795 | -0.258245 | -1.845235 |
| H                                                                    | -3.806682 | 0.276557  | -3.053401 | H                                                                    | -3.686270 | 0.229940  | -3.111143 |
| H                                                                    | -4.542513 | -0.915455 | -1.409540 | H                                                                    | -4.501518 | -0.876297 | -1.444339 |
| Te                                                                   | 0.883098  | 1.876254  | 2.502144  | Te                                                                   | 0.838440  | 1.880049  | 2.491294  |
| Te                                                                   | -0.890280 | -1.874855 | 2.493229  | Te                                                                   | -0.838439 | -1.880050 | 2.491295  |
| P                                                                    | -0.008407 | 0.000421  | 3.766356  | P                                                                    | -0.000000 | 0.000000  | 3.784362  |
| H                                                                    | -0.986331 | 0.464963  | 4.671627  | H                                                                    | -0.988959 | 0.434900  | 4.692735  |
| H                                                                    | 0.962931  | -0.467244 | 4.677058  | H                                                                    | 0.988958  | -0.434899 | 4.692736  |
| Te                                                                   | 1.601779  | 1.875722  | -2.206446 | Te                                                                   | 1.538308  | 1.914978  | -2.097157 |
| Te                                                                   | 2.863683  | -1.558637 | -0.298806 | Te                                                                   | 2.781388  | -1.589352 | -0.351828 |
| P                                                                    | 3.372459  | 0.256208  | -1.837292 | P                                                                    | 3.297795  | 0.258245  | -1.845236 |
| H                                                                    | 4.551621  | 0.915391  | -1.429489 | H                                                                    | 4.501518  | 0.876296  | -1.444341 |
| H                                                                    | 3.807977  | -0.278253 | -3.068431 | H                                                                    | 3.686268  | -0.229941 | -3.111144 |

|                                                                   |           |           |           |                                                                   |           |           |           |
|-------------------------------------------------------------------|-----------|-----------|-----------|-------------------------------------------------------------------|-----------|-----------|-----------|
| 16<br>Eu(H <sub>2</sub> PO <sub>2</sub> ) <sub>3</sub> PBE SC ECP |           |           |           | 16<br>Am(H <sub>2</sub> PO <sub>2</sub> ) <sub>3</sub> PBE SC ECP |           |           |           |
| Eu                                                                | 0.009817  | -0.000019 | -0.000012 | Am                                                                | -0.001169 | 0.000000  | 0.000000  |
| O                                                                 | -0.485425 | -2.076013 | 1.092123  | O                                                                 | -0.489999 | -2.093197 | 1.098179  |
| O                                                                 | -1.555450 | -1.458754 | -1.106876 | O                                                                 | -1.570530 | -1.471655 | -1.100046 |
| P                                                                 | -1.477945 | -2.542161 | -0.002607 | P                                                                 | -1.477380 | -2.561404 | -0.001425 |
| H                                                                 | -2.761998 | -2.804042 | 0.561922  | H                                                                 | -2.760692 | -2.840965 | 0.554982  |
| H                                                                 | -1.088949 | -3.799252 | -0.553397 | H                                                                 | -1.072159 | -3.810121 | -0.558635 |
| O                                                                 | 2.052899  | 0.614072  | 1.101545  | O                                                                 | 2.056779  | 0.630771  | 1.094741  |
| O                                                                 | 2.052927  | -0.614057 | -1.101545 | O                                                                 | 2.056779  | -0.630771 | -1.094741 |
| P                                                                 | 2.953268  | 0.000023  | 0.000002  | P                                                                 | 2.955213  | 0.000000  | -0.000000 |
| H                                                                 | 3.835239  | -0.974668 | 0.555124  | H                                                                 | 3.836959  | -0.969302 | 0.563916  |
| H                                                                 | 3.835209  | 0.974744  | -0.555114 | H                                                                 | 3.836959  | 0.969302  | -0.563917 |
| O                                                                 | -1.555431 | 1.458725  | 1.106865  | O                                                                 | -1.570530 | 1.471656  | 1.100047  |
| O                                                                 | -0.485410 | 2.075983  | -1.092137 | O                                                                 | -0.489999 | 2.093197  | -1.098178 |
| P                                                                 | -1.477910 | 2.542142  | 0.002607  | P                                                                 | -1.477380 | 2.561404  | 0.001425  |

|                                                                    |           |           |           |                                                                    |           |           |           |
|--------------------------------------------------------------------|-----------|-----------|-----------|--------------------------------------------------------------------|-----------|-----------|-----------|
| H                                                                  | -1.088879 | 3.799217  | 0.553407  | H                                                                  | -1.072159 | 3.810122  | 0.558635  |
| H                                                                  | -2.761961 | 2.804061  | -0.561909 | H                                                                  | -2.760692 | 2.840965  | -0.554982 |
| 16<br>Eu(H <sub>2</sub> PS <sub>2</sub> ) <sub>3</sub> PBE SC ECP  |           |           |           | 16<br>Am(H <sub>2</sub> PS <sub>2</sub> ) <sub>3</sub> PBE SC ECP  |           |           |           |
| Eu                                                                 | -0.000000 | -0.000000 | 0.032236  | Am                                                                 | -0.000003 | 0.000000  | 0.010709  |
| S                                                                  | -2.523677 | 1.287271  | -0.366036 | S                                                                  | -2.492499 | 1.293698  | -0.346838 |
| S                                                                  | -1.435184 | -1.608093 | -1.854479 | S                                                                  | -1.415441 | -1.590253 | -1.858414 |
| P                                                                  | -2.901896 | -0.226907 | -1.656421 | P                                                                  | -2.893276 | -0.225072 | -1.625687 |
| H                                                                  | -3.244565 | 0.312958  | -2.930712 | H                                                                  | -3.269778 | 0.302674  | -2.895172 |
| H                                                                  | -4.120850 | -0.875759 | -1.301610 | H                                                                  | -4.097574 | -0.879987 | -1.234623 |
| S                                                                  | 0.720963  | 1.558311  | 2.321627  | S                                                                  | 0.729943  | 1.552939  | 2.265274  |
| S                                                                  | -0.720962 | -1.558311 | 2.321627  | S                                                                  | -0.729945 | -1.552937 | 2.265277  |
| P                                                                  | 0.000000  | 0.000000  | 3.394677  | P                                                                  | 0.000003  | 0.000000  | 3.341195  |
| H                                                                  | -0.993980 | 0.471039  | 4.302216  | H                                                                  | -0.995204 | 0.470130  | 4.247541  |
| H                                                                  | 0.993981  | -0.471039 | 4.302216  | H                                                                  | 0.995219  | -0.470132 | 4.247531  |
| S                                                                  | 1.435184  | 1.608093  | -1.854478 | S                                                                  | 1.415439  | 1.590252  | -1.858413 |
| S                                                                  | 2.523677  | -1.287271 | -0.366035 | S                                                                  | 2.492494  | -1.293699 | -0.346834 |
| P                                                                  | 2.901896  | 0.226907  | -1.656420 | P                                                                  | 2.893274  | 0.225071  | -1.625682 |
| H                                                                  | 4.120850  | 0.875759  | -1.301609 | H                                                                  | 4.097570  | 0.879987  | -1.234614 |
| H                                                                  | 3.244565  | -0.312958 | -2.930712 | H                                                                  | 3.269780  | -0.302675 | -2.895166 |
| 16<br>Eu(H <sub>2</sub> PSe <sub>2</sub> ) <sub>3</sub> PBE SC ECP |           |           |           | 16<br>Am(H <sub>2</sub> PSe <sub>2</sub> ) <sub>3</sub> PBE SC ECP |           |           |           |
| Eu                                                                 | -0.000904 | -0.000526 | 0.051550  | Am                                                                 | 0.000000  | -0.000000 | 0.013587  |
| Se                                                                 | -2.629335 | 1.400208  | -0.335984 | Se                                                                 | -2.589049 | 1.406869  | -0.314294 |
| Se                                                                 | -1.427366 | -1.738688 | -1.941980 | Se                                                                 | -1.419248 | -1.713881 | -1.951066 |
| P                                                                  | -2.990376 | -0.231550 | -1.737895 | P                                                                  | -3.001339 | -0.234743 | -1.691380 |
| H                                                                  | -3.309256 | 0.312947  | -3.015820 | H                                                                  | -3.379909 | 0.290799  | -2.960752 |
| H                                                                  | -4.222288 | -0.873014 | -1.419309 | H                                                                  | -4.209499 | -0.886304 | -1.308788 |
| Se                                                                 | 0.783725  | 1.689444  | 2.411775  | Se                                                                 | 0.796741  | 1.677126  | 2.327479  |
| Se                                                                 | -0.783010 | -1.689029 | 2.413911  | Se                                                                 | -0.796740 | -1.677125 | 2.327479  |
| P                                                                  | 0.001281  | 0.000476  | 3.548255  | P                                                                  | 0.000000  | 0.000000  | 3.472634  |
| H                                                                  | -0.986627 | 0.470101  | 4.462052  | H                                                                  | -0.989555 | 0.471317  | 4.383733  |
| H                                                                  | 0.990617  | -0.468626 | 4.460773  | H                                                                  | 0.989555  | -0.471316 | 4.383733  |
| Se                                                                 | 1.427399  | 1.739599  | -1.939113 | Se                                                                 | 1.419248  | 1.713880  | -1.951066 |
| Se                                                                 | 2.626696  | -1.402484 | -0.336545 | Se                                                                 | 2.589049  | -1.406870 | -0.314295 |
| P                                                                  | 2.989318  | 0.231238  | -1.735832 | P                                                                  | 3.001339  | 0.234742  | -1.691381 |
| H                                                                  | 4.221353  | 0.871569  | -1.415464 | H                                                                  | 4.209500  | 0.886303  | -1.308790 |
| H                                                                  | 3.308774  | -0.311664 | -3.014289 | H                                                                  | 3.379908  | -0.290800 | -2.960753 |
| 16<br>Eu(H <sub>2</sub> PTe <sub>2</sub> ) <sub>3</sub> PBE SC ECP |           |           |           | 16<br>Am(H <sub>2</sub> PTe <sub>2</sub> ) <sub>3</sub> PBE SC ECP |           |           |           |
| Eu                                                                 | 0.006964  | 0.002067  | -0.038309 | Am                                                                 | -0.000000 | -0.000000 | -0.001712 |
| Te                                                                 | -2.786754 | 1.586419  | -0.250523 | Te                                                                 | -2.739553 | 1.584820  | -0.281775 |
| Te                                                                 | -1.534688 | -1.890436 | -2.157351 | Te                                                                 | -1.467518 | -1.897836 | -2.097158 |
| P                                                                  | -3.268407 | -0.246202 | -1.764036 | P                                                                  | -3.217508 | -0.252584 | -1.787832 |
| H                                                                  | -3.720065 | 0.286371  | -3.006053 | H                                                                  | -3.630406 | 0.256269  | -3.053429 |
| H                                                                  | -4.460047 | -0.908342 | -1.349520 | H                                                                  | -4.425839 | -0.895973 | -1.391565 |
| Te                                                                 | 0.864493  | 1.898962  | 2.422558  | Te                                                                 | 0.877416  | 1.875610  | 2.411904  |
| Te                                                                 | -0.872114 | -1.897802 | 2.410323  | Te                                                                 | -0.877415 | -1.875611 | 2.411905  |
| P                                                                  | -0.010247 | 0.000010  | 3.649881  | P                                                                  | 0.000000  | 0.000000  | 3.671186  |
| H                                                                  | -0.999480 | 0.458478  | 4.567353  | H                                                                  | -0.985336 | 0.459000  | 4.593159  |
| H                                                                  | 0.970447  | -0.461572 | 4.574882  | H                                                                  | 0.985336  | -0.458999 | 4.593160  |

|    |          |           |           |    |          |           |           |
|----|----------|-----------|-----------|----|----------|-----------|-----------|
| Te | 1.540704 | 1.889495  | -2.166124 | Te | 1.467518 | 1.897836  | -2.097157 |
| Te | 2.800960 | -1.582044 | -0.259464 | Te | 2.739553 | -1.584821 | -0.281775 |
| P  | 3.276503 | 0.245496  | -1.780118 | P  | 3.217507 | 0.252584  | -1.787833 |
| H  | 4.470457 | 0.908520  | -1.373761 | H  | 4.425839 | 0.895973  | -1.391567 |
| H  | 3.721277 | -0.289419 | -3.023649 | H  | 3.630405 | -0.256269 | -3.053429 |

|    |                                                             |           |           |    |                                                             |           |           |
|----|-------------------------------------------------------------|-----------|-----------|----|-------------------------------------------------------------|-----------|-----------|
| 16 | Eu(H <sub>2</sub> PO <sub>2</sub> ) <sub>3</sub> M06 SC ECP |           |           | 16 | Am(H <sub>2</sub> PO <sub>2</sub> ) <sub>3</sub> M06 SC ECP |           |           |
| Eu | 0.032719                                                    | -0.000017 | -0.000016 | Am | 0.030359                                                    | 0.000000  | -0.000000 |
| O  | -0.414691                                                   | -2.058422 | 1.035362  | O  | -0.421416                                                   | -2.111226 | 1.027011  |
| O  | -1.585667                                                   | -1.367816 | -1.034987 | O  | -1.631382                                                   | -1.400609 | -1.020690 |
| P  | -1.465820                                                   | -2.463261 | 0.011748  | P  | -1.487549                                                   | -2.504876 | 0.014537  |
| H  | -2.701198                                                   | -2.714257 | 0.634937  | H  | -2.711550                                                   | -2.766000 | 0.656355  |
| H  | -1.151228                                                   | -3.693501 | -0.590926 | H  | -1.177779                                                   | -3.728144 | -0.605313 |
| O  | 2.043901                                                    | 0.608459  | 1.080257  | O  | 2.090997                                                    | 0.614334  | 1.079986  |
| O  | 2.043928                                                    | -0.608454 | -1.080262 | O  | 2.090997                                                    | -0.614334 | -1.079986 |
| P  | 2.926429                                                    | 0.000017  | 0.000001  | P  | 2.969893                                                    | 0.000000  | 0.000000  |
| H  | 3.795048                                                    | -0.960043 | 0.550155  | H  | 3.838554                                                    | -0.958221 | 0.553591  |
| H  | 3.795015                                                    | 0.960109  | -0.550150 | H  | 3.838555                                                    | 0.958221  | -0.553590 |
| O  | -1.585640                                                   | 1.367794  | 1.034979  | O  | -1.631382                                                   | 1.400609  | 1.020690  |
| O  | -0.414660                                                   | 2.058410  | -1.035363 | O  | -0.421416                                                   | 2.111226  | -1.027012 |
| P  | -1.465785                                                   | 2.463248  | -0.011745 | P  | -1.487549                                                   | 2.504875  | -0.014537 |
| H  | -1.151189                                                   | 3.693481  | 0.590941  | H  | -1.177779                                                   | 3.728144  | 0.605312  |
| H  | -2.701161                                                   | 2.714254  | -0.634933 | H  | -2.711551                                                   | 2.766000  | -0.656354 |

|    |                                                             |           |           |    |                                                             |           |           |
|----|-------------------------------------------------------------|-----------|-----------|----|-------------------------------------------------------------|-----------|-----------|
| 16 | Eu(H <sub>2</sub> PS <sub>2</sub> ) <sub>3</sub> M06 SC ECP |           |           | 16 | Am(H <sub>2</sub> PS <sub>2</sub> ) <sub>3</sub> M06 SC ECP |           |           |
| Eu | 0.000001                                                    | 0.000000  | 0.070058  | Am | 0.000000                                                    | -0.000000 | 0.086451  |
| S  | -2.446834                                                   | 1.255787  | -0.378918 | S  | -2.456895                                                   | 1.261388  | -0.389951 |
| S  | -1.361880                                                   | -1.623919 | -1.782072 | S  | -1.346857                                                   | -1.621490 | -1.788773 |
| P  | -2.792076                                                   | -0.242162 | -1.658969 | P  | -2.780318                                                   | -0.239943 | -1.671542 |
| H  | -3.056926                                                   | 0.286939  | -2.937527 | H  | -3.039080                                                   | 0.283864  | -2.953492 |
| H  | -4.025347                                                   | -0.852851 | -1.354904 | H  | -4.012339                                                   | -0.855802 | -1.372710 |
| S  | 0.779836                                                    | 1.494676  | 2.322755  | S  | 0.797859                                                    | 1.490254  | 2.348880  |
| S  | -0.779836                                                   | -1.494676 | 2.322754  | S  | -0.797859                                                   | -1.490254 | 2.348880  |
| P  | -0.000000                                                   | 0.000000  | 3.391673  | P  | -0.000000                                                   | 0.000000  | 3.412035  |
| H  | -0.955724                                                   | 0.521679  | 4.286813  | H  | -0.952957                                                   | 0.527512  | 4.306389  |
| H  | 0.955722                                                    | -0.521678 | 4.286814  | H  | 0.952957                                                    | -0.527512 | 4.306389  |
| S  | 1.361881                                                    | 1.623920  | -1.782072 | S  | 1.346858                                                    | 1.621490  | -1.788773 |
| S  | 2.446834                                                    | -1.255787 | -0.378918 | S  | 2.456895                                                    | -1.261389 | -0.389951 |
| P  | 2.792077                                                    | 0.242161  | -1.658969 | P  | 2.780318                                                    | 0.239942  | -1.671542 |
| H  | 4.025348                                                    | 0.852850  | -1.354905 | H  | 4.012340                                                    | 0.855801  | -1.372711 |
| H  | 3.056925                                                    | -0.286939 | -2.937528 | H  | 3.039079                                                    | -0.283865 | -2.953493 |

|    |                                                              |           |           |    |                                                              |           |           |
|----|--------------------------------------------------------------|-----------|-----------|----|--------------------------------------------------------------|-----------|-----------|
| 16 | Eu(H <sub>2</sub> PSe <sub>2</sub> ) <sub>3</sub> M06 SC ECP |           |           | 16 | Am(H <sub>2</sub> PSe <sub>2</sub> ) <sub>3</sub> M06 SC ECP |           |           |
| Eu | -0.000743                                                    | 0.000467  | 0.065436  | Am | 0.000001                                                     | -0.000001 | 0.084133  |
| Se | -2.544960                                                    | 1.397052  | -0.236354 | Se | -2.541408                                                    | 1.408534  | -0.263119 |
| Se | -1.283902                                                    | -1.761135 | -1.903159 | Se | -1.275284                                                    | -1.770898 | -1.886531 |
| P  | -2.815797                                                    | -0.234485 | -1.664117 | P  | -2.803214                                                    | -0.231883 | -1.677273 |
| H  | -3.085983                                                    | 0.324925  | -2.928894 | H  | -3.061887                                                    | 0.307454  | -2.953105 |
| H  | -4.046693                                                    | -0.861176 | -1.383963 | H  | -4.036614                                                    | -0.854563 | -1.398591 |

|                                                                    |           |           |           |                                                                    |           |           |           |
|--------------------------------------------------------------------|-----------|-----------|-----------|--------------------------------------------------------------------|-----------|-----------|-----------|
| Se                                                                 | 0.865639  | 1.680484  | 2.314162  | Se                                                                 | 0.864086  | 1.680390  | 2.335140  |
| Se                                                                 | -0.867861 | -1.679051 | 2.314641  | Se                                                                 | -0.864082 | -1.680391 | 2.335140  |
| P                                                                  | 0.000389  | 0.000046  | 3.397952  | P                                                                  | -0.000000 | 0.000001  | 3.421537  |
| H                                                                  | -0.952202 | 0.518790  | 4.297577  | H                                                                  | -0.957017 | 0.514782  | 4.318686  |
| H                                                                  | 0.956459  | -0.519663 | 4.293304  | H                                                                  | 0.957013  | -0.514780 | 4.318691  |
| Se                                                                 | 1.284588  | 1.761815  | -1.902283 | Se                                                                 | 1.275284  | 1.770898  | -1.886531 |
| Se                                                                 | 2.543341  | -1.397041 | -0.235057 | Se                                                                 | 2.541410  | -1.408536 | -0.263121 |
| P                                                                  | 2.815479  | 0.234238  | -1.662860 | P                                                                  | 2.803214  | 0.231882  | -1.677274 |
| H                                                                  | 4.046808  | 0.860079  | -1.382680 | H                                                                  | 4.036614  | 0.854562  | -1.398593 |
| H                                                                  | 3.085439  | -0.325345 | -2.927619 | H                                                                  | 3.061886  | -0.307454 | -2.953108 |
| 16<br>Eu(H <sub>2</sub> PTe <sub>2</sub> ) <sub>3</sub> M06 SC ECP |           |           |           | 16<br>Am(H <sub>2</sub> PTe <sub>2</sub> ) <sub>3</sub> M06 SC ECP |           |           |           |
| Eu                                                                 | 0.622814  | -0.691985 | 0.603247  | Am                                                                 | -0.008663 | 0.049923  | -0.418376 |
| Te                                                                 | -1.891185 | 1.397739  | 0.140229  | Te                                                                 | -2.643425 | 1.811206  | -0.442193 |
| Te                                                                 | -0.903061 | -2.042052 | -2.059589 | Te                                                                 | -1.573238 | -1.729929 | -2.484997 |
| P                                                                  | -2.313534 | -0.092494 | -1.810161 | P                                                                  | -3.269174 | -0.344776 | -1.396030 |
| H                                                                  | -2.302556 | 0.726941  | -2.961290 | H                                                                  | -4.362422 | -0.185759 | -2.274977 |
| H                                                                  | -3.682069 | -0.447508 | -1.782867 | H                                                                  | -3.888436 | -1.108466 | -0.381551 |
| Te                                                                 | 0.885444  | 1.737080  | 2.768567  | Te                                                                 | 1.168071  | 1.801088  | 1.914671  |
| Te                                                                 | -0.493093 | -2.317184 | 3.119176  | Te                                                                 | -0.997298 | -1.832447 | 1.949745  |
| P                                                                  | -0.482114 | 0.020755  | 3.832901  | P                                                                  | -0.033760 | 0.065723  | 3.148640  |
| H                                                                  | -1.821615 | 0.472101  | 3.840185  | H                                                                  | -1.033331 | 0.667338  | 3.945395  |
| H                                                                  | -0.222276 | 0.049693  | 5.218971  | H                                                                  | 0.795587  | -0.447505 | 4.170257  |
| Te                                                                 | 0.896164  | 1.951880  | -1.565728 | Te                                                                 | 1.775851  | 2.058544  | -2.115559 |
| Te                                                                 | 3.591620  | -1.283421 | -0.563584 | Te                                                                 | 2.416308  | -1.943614 | -0.937276 |
| P                                                                  | 2.568906  | 0.198022  | -2.188916 | P                                                                  | 3.290610  | 0.261352  | -1.452336 |
| H                                                                  | 3.578067  | 0.874172  | -2.910696 | H                                                                  | 4.050628  | 0.701678  | -0.345858 |
| H                                                                  | 1.968485  | -0.553738 | -3.224355 | H                                                                  | 4.312686  | 0.175644  | -2.423468 |

|                                                                     |           |           |           |                                                                     |           |           |           |
|---------------------------------------------------------------------|-----------|-----------|-----------|---------------------------------------------------------------------|-----------|-----------|-----------|
| 16<br>Eu(H <sub>2</sub> PO <sub>2</sub> ) <sub>3</sub> wB97X SC ECP |           |           |           | 16<br>Am(H <sub>2</sub> PO <sub>2</sub> ) <sub>3</sub> wB97X SC ECP |           |           |           |
| Eu                                                                  | 0.005927  | -0.000029 | -0.000041 | Am                                                                  | 0.009178  | 0.000000  | 0.000000  |
| O                                                                   | -0.499135 | -2.042243 | 1.080811  | O                                                                   | -0.502428 | -2.102946 | 1.075630  |
| O                                                                   | -1.524006 | -1.460038 | -1.098431 | O                                                                   | -1.568598 | -1.486173 | -1.081276 |
| P                                                                   | -1.464957 | -2.524758 | -0.003051 | P                                                                   | -1.489320 | -2.563240 | 0.001566  |
| H                                                                   | -2.741363 | -2.778906 | 0.534180  | H                                                                   | -2.757565 | -2.818009 | 0.558412  |
| H                                                                   | -1.061856 | -3.770130 | -0.520515 | H                                                                   | -1.102974 | -3.803245 | -0.542205 |
| O                                                                   | 2.030171  | 0.580222  | 1.095160  | O                                                                   | 2.083118  | 0.593427  | 1.090787  |
| O                                                                   | 2.030221  | -0.580187 | -1.095169 | O                                                                   | 2.083118  | -0.593427 | -1.090787 |
| P                                                                   | 2.925939  | 0.000036  | 0.000007  | P                                                                   | 2.976023  | -0.000000 | -0.000000 |
| H                                                                   | 3.795085  | -0.978467 | 0.518779  | H                                                                   | 3.845166  | -0.974088 | 0.527979  |
| H                                                                   | 3.795058  | 0.978571  | -0.518751 | H                                                                   | 3.845166  | 0.974088  | -0.527979 |
| O                                                                   | -1.523990 | 1.459976  | 1.098401  | O                                                                   | -1.568598 | 1.486173  | 1.081276  |
| O                                                                   | -0.499131 | 2.042203  | -1.080842 | O                                                                   | -0.502428 | 2.102947  | -1.075629 |
| P                                                                   | -1.464911 | 2.524728  | 0.003056  | P                                                                   | -1.489320 | 2.563240  | -0.001566 |
| H                                                                   | -1.061738 | 3.770065  | 0.520550  | H                                                                   | -1.102975 | 3.803245  | 0.542205  |
| H                                                                   | -2.741313 | 2.778958  | -0.534144 | H                                                                   | -2.757565 | 2.818008  | -0.558413 |
| 16<br>Eu(H <sub>2</sub> PS <sub>2</sub> ) <sub>3</sub> wB97X SC ECP |           |           |           | 16<br>Am(H <sub>2</sub> PS <sub>2</sub> ) <sub>3</sub> wB97X SC ECP |           |           |           |
| Eu                                                                  | 0.000000  | 0.000000  | 0.028673  | Am                                                                  | -0.000000 | -0.000000 | 0.012510  |

|    |                                                                |           |           |    |                                                                |           |             |
|----|----------------------------------------------------------------|-----------|-----------|----|----------------------------------------------------------------|-----------|-------------|
| S  | -2.448233                                                      | 1.302582  | -0.409818 | S  | -2.488378                                                      | 1.302363  | -0.413311   |
| S  | -1.441612                                                      | -1.628984 | -1.759199 | S  | -1.466645                                                      | -1.605843 | -1.814957   |
| P  | -2.871945                                                      | -0.229371 | -1.634185 | P  | -2.913599                                                      | -0.227375 | -1.639234   |
| H  | -3.182408                                                      | 0.254819  | -2.917185 | H  | -3.263362                                                      | 0.260132  | -2.910985   |
| H  | -4.089712                                                      | -0.818692 | -1.251613 | H  | -4.111188                                                      | -0.841917 | -1.232505   |
| S  | 0.661145                                                       | 1.556397  | 2.271676  | S  | 0.678543                                                       | 1.551441  | 2.292486    |
| S  | -0.661145                                                      | -1.556397 | 2.271676  | S  | -0.678543                                                      | -1.551441 | 2.292487    |
| P  | 0.000000                                                       | -0.000000 | 3.350410  | P  | 0.000000                                                       | 0.000000  | 3.367895    |
| H  | -1.002733                                                      | 0.426454  | 4.238826  | H  | -0.998689                                                      | 0.436416  | 4.256345    |
| H  | 1.002734                                                       | -0.426454 | 4.238825  | H  | 0.998690                                                       | -0.436416 | 4.256345    |
| S  | 1.441613                                                       | 1.628984  | -1.759199 | S  | 1.466645                                                       | 1.605842  | -1.814957   |
| S  | 2.448234                                                       | -1.302582 | -0.409818 | S  | 2.488378                                                       | -1.302364 | -0.413311   |
| P  | 2.871945                                                       | 0.229370  | -1.634184 | P  | 2.913599                                                       | 0.227375  | -1.639234   |
| H  | 4.089713                                                       | 0.818691  | -1.251613 | H  | 4.111188                                                       | 0.841916  | -1.232506   |
| H  | 3.182407                                                       | -0.254819 | -2.917185 | H  | 3.263362                                                       | -0.260133 | -2.910985   |
| 16 | Eu(H <sub>2</sub> PSe <sub>2</sub> ) <sub>3</sub> wB97X SC ECP |           |           | 16 | Am(H <sub>2</sub> PSe <sub>2</sub> ) <sub>3</sub> wB97X SC ECP |           |             |
| Eu | -0.000930                                                      | -0.000721 | 0.051705  | Am | -0.000000                                                      | 0.000000  | 0.011892    |
| Se | -2.571097                                                      | 1.386963  | -0.346764 | Se | -2.583647                                                      | 1.417883  | -0.388029   |
| Se | -1.419841                                                      | -1.726070 | -1.880149 | Se | -1.475483                                                      | -1.725168 | -1.908694   |
| P  | -2.970556                                                      | -0.229598 | -1.724669 | P  | -3.029495                                                      | -0.236211 | -1.706011   |
| H  | -3.262626                                                      | 0.290012  | -2.997811 | H  | -3.388015                                                      | 0.247171  | -2.976414   |
| H  | -4.192354                                                      | -0.839927 | -1.392623 | H  | -4.227396                                                      | -0.849600 | -1.300555   |
| Se | 0.736740                                                       | 1.675286  | 2.367610  | Se | 0.736756                                                       | 1.676885  | 2.354980    |
| Se | -0.735927                                                      | -1.675072 | 2.369819  | Se | -0.736756                                                      | -1.676884 | 2.354980    |
| P  | 0.001234                                                       | 0.000507  | 3.519048  | P  | 0.000000                                                       | -0.000000 | 3.502964    |
| H  | -0.992061                                                      | 0.437534  | 4.412337  | H  | -0.994986                                                      | 0.434824  | 4.395338    |
| H  | 0.995739                                                       | -0.435962 | 4.411256  | H  | 0.994987                                                       | -0.434824 | 4.395338    |
| Se | 1.419343                                                       | 1.726345  | -1.878008 | Se | 1.475483                                                       | 1.725167  | -1.908694   |
| Se | 2.568572                                                       | -1.389239 | -0.347798 | Se | 2.583647                                                       | -1.417882 | -0.388028   |
| P  | 2.969599                                                       | 0.229396  | -1.722862 | P  | 3.029495                                                       | 0.236211  | -1.706012   |
| H  | 4.191165                                                       | 0.838971  | -1.388576 | H  | 4.227397                                                       | 0.849599  | -1.300557   |
| H  | 3.263002                                                       | -0.288423 | -2.996429 | H  | 3.388014                                                       | -0.247173 | -2.976414*- |
| 16 | Eu(H <sub>2</sub> PTe <sub>2</sub> ) <sub>3</sub> wB97X SC ECP |           |           | 16 | Am(H <sub>2</sub> PTe <sub>2</sub> ) <sub>3</sub> wB97X SC ECP |           |             |
| Eu | 0.005105                                                       | 0.002475  | -0.022890 | Am | -0.000000                                                      | -0.000000 | 0.003897    |
| Te | -2.773649                                                      | 1.541036  | -0.278456 | Te | -2.750664                                                      | 1.580658  | -0.359322   |
| Te | -1.530608                                                      | -1.848852 | -2.136588 | Te | -1.520521                                                      | -1.895806 | -2.065924   |
| P  | -3.292491                                                      | -0.247921 | -1.800560 | P  | -3.262688                                                      | -0.253756 | -1.828430   |
| H  | -3.716443                                                      | 0.277736  | -3.034089 | H  | -3.645340                                                      | 0.225324  | -3.093959   |
| H  | -4.467782                                                      | -0.900059 | -1.388189 | H  | -4.460113                                                      | -0.868504 | -1.422127   |
| Te | 0.860558                                                       | 1.847436  | 2.441872  | Te | 0.822464                                                       | 1.860241  | 2.466918    |
| Te | -0.866927                                                      | -1.844123 | 2.428993  | Te | -0.822463                                                      | -1.860241 | 2.466918    |
| P  | -0.008097                                                      | -0.000062 | 3.714033  | P  | 0.000000                                                       | 0.000000  | 3.751625    |
| H  | -0.988889                                                      | 0.455840  | 4.612359  | H  | -0.988911                                                      | 0.431376  | 4.653125    |
| H  | 0.965823                                                       | -0.460774 | 4.617378  | H  | 0.988911                                                       | -0.431375 | 4.653125    |
| Te | 1.534745                                                       | 1.846188  | -2.143899 | Te | 1.520521                                                       | 1.895806  | -2.065924   |
| Te | 2.785825                                                       | -1.535837 | -0.283309 | Te | 2.750664                                                       | -1.580658 | -0.359321   |
| P  | 3.299419                                                       | 0.246955  | -1.813505 | P  | 3.262688                                                       | 0.253756  | -1.828431   |
| H  | 4.476165                                                       | 0.901433  | -1.409127 | H  | 4.460113                                                       | 0.868503  | -1.422129   |
| H  | 3.717249                                                       | -0.281472 | -3.047936 | H  | 3.645339                                                       | -0.225325 | -3.093959   |

|                                                                                                                                                                                                                                                                                                                                                                                                                                                                                                                                                                                                                                                         |                                                                                                                                                                                                                                                                                                                                                                                                                                                                                                                                                                                                                                                          |
|---------------------------------------------------------------------------------------------------------------------------------------------------------------------------------------------------------------------------------------------------------------------------------------------------------------------------------------------------------------------------------------------------------------------------------------------------------------------------------------------------------------------------------------------------------------------------------------------------------------------------------------------------------|----------------------------------------------------------------------------------------------------------------------------------------------------------------------------------------------------------------------------------------------------------------------------------------------------------------------------------------------------------------------------------------------------------------------------------------------------------------------------------------------------------------------------------------------------------------------------------------------------------------------------------------------------------|
| <p>16<br/>Eu(H<sub>2</sub>PO<sub>2</sub>)<sub>3</sub> B5050LYP SC ECP</p> <p>Eu 0.004092 -0.000026 -0.000032<br/>O -0.510961 -2.040282 1.075797<br/>O -1.513005 -1.463810 -1.081702<br/>P -1.461382 -2.523887 -0.000801<br/>H -2.732185 -2.781014 0.521684<br/>H -1.058032 -3.758742 -0.516578<br/>O 2.028238 0.573329 1.081552<br/>O 2.028283 -0.573301 -1.081561<br/>P 2.921300 0.000033 0.000005<br/>H 3.784509 -0.971244 0.515498<br/>H 3.784481 0.971341 -0.515474<br/>O -1.512983 1.463760 1.081680<br/>O -0.510951 2.040246 -1.075821<br/>P -1.461337 2.523860 0.000805<br/>H -1.057929 3.758687 0.516604<br/>H -2.732137 2.781051 -0.521656</p> | <p>16<br/>Am(H<sub>2</sub>PO<sub>2</sub>)<sub>3</sub> B5050LYP SC ECP</p> <p>Am -0.000920 -0.000000 0.000000<br/>O -0.510089 -2.104783 1.063231<br/>O -1.568834 -1.494221 -1.064155<br/>P -1.482977 -2.570251 -0.000973<br/>H -2.739998 -2.843371 0.546819<br/>H -1.087331 -3.793623 -0.549915<br/>O 2.076816 0.616904 1.060313<br/>O 2.076816 -0.616903 -1.060313<br/>P 2.966191 -0.000000 0.000000<br/>H 3.829778 -0.950033 0.553819<br/>H 3.829778 0.950032 -0.553819<br/>O -1.568834 1.494221 1.064155<br/>O -0.510089 2.104783 -1.063231<br/>P -1.482977 2.570251 0.000973<br/>H -1.087332 3.793623 0.549915<br/>H -2.739998 2.843370 -0.546819</p> |
| <p>16<br/>Eu(H<sub>2</sub>PS<sub>2</sub>)<sub>3</sub> B5050LYP SC ECP</p> <p>Eu -0.000000 0.000000 0.027506<br/>S -2.433686 1.337681 -0.474722<br/>S -1.479153 -1.649216 -1.726197<br/>P -2.891845 -0.226996 -1.644757<br/>H -3.199925 0.211895 -2.935679<br/>H -4.109788 -0.780137 -1.239453<br/>S 0.592292 1.581407 2.290210<br/>S -0.592291 -1.581406 2.290210<br/>P 0.000000 0.000000 3.374006<br/>H -1.015602 0.376289 4.257884<br/>H 1.015603 -0.376289 4.257883<br/>S 1.479153 1.649216 -1.726197<br/>S 2.433685 -1.337681 -0.474721<br/>P 2.891845 0.226996 -1.644757<br/>H 4.109788 0.780137 -1.239452<br/>H 3.199925 -0.211895 -2.935678</p>  | <p>16<br/>Am(H<sub>2</sub>PS<sub>2</sub>)<sub>3</sub> B5050LYP SC ECP</p> <p>Am -0.000000 0.000000 0.009373<br/>S -2.488587 1.318140 -0.458914<br/>S -1.508733 -1.626831 -1.794481<br/>P -2.941587 -0.230018 -1.652769<br/>H -3.283310 0.231896 -2.926770<br/>H -4.141174 -0.813656 -1.236264<br/>S 0.633083 1.567349 2.314869<br/>S -0.633082 -1.567349 2.314869<br/>P 0.000000 0.000000 3.395828<br/>H -1.005016 0.402884 4.279770<br/>H 1.005017 -0.402883 4.279769<br/>S 1.508733 1.626830 -1.794481<br/>S 2.488587 -1.318140 -0.458914<br/>P 2.941586 0.230018 -1.652769<br/>H 4.141174 0.813656 -1.236264<br/>H 3.283310 -0.231896 -2.926770</p>   |
| <p>16<br/>Eu(H<sub>2</sub>PSe<sub>2</sub>)<sub>3</sub> B5050LYP SC ECP</p> <p>Eu -0.000606 -0.000316 0.043481<br/>Se -2.529747 1.443773 -0.434226<br/>Se -1.471147 -1.769197 -1.811604<br/>P -2.990253 -0.232302 -1.722404<br/>H -3.279969 0.219937 -3.013010<br/>H -4.217063 -0.788211 -1.348714<br/>Se 0.651983 1.707410 2.363290<br/>Se -0.651549 -1.707216 2.364433<br/>P 0.000764 0.000290 3.521635<br/>H -1.009852 0.380476 4.409517<br/>H 1.012187 -0.379704 4.408678</p>                                                                                                                                                                        | <p>16<br/>Am(H<sub>2</sub>PSe<sub>2</sub>)<sub>3</sub> B5050LYP SC ECP</p> <p>Am 0.000000 -0.000000 0.009482<br/>Se -2.577863 1.432133 -0.429429<br/>Se -1.516255 -1.751540 -1.881145<br/>P -3.053482 -0.240104 -1.716838<br/>H -3.399288 0.221027 -2.990215<br/>H -4.255583 -0.821662 -1.304204<br/>Se 0.692084 1.693729 2.370976<br/>Se -0.692084 -1.693729 2.370977<br/>P 0.000000 0.000000 3.524296<br/>H -1.001445 0.403958 4.412007<br/>H 1.001446 -0.403958 4.412007</p>                                                                                                                                                                          |

|                                                                         |           |           |           |                                                                         |           |           |           |
|-------------------------------------------------------------------------|-----------|-----------|-----------|-------------------------------------------------------------------------|-----------|-----------|-----------|
| Se                                                                      | 1.470777  | 1.769214  | -1.810590 | Se                                                                      | 1.516254  | 1.751539  | -1.881146 |
| Se                                                                      | 2.528245  | -1.444799 | -0.434636 | Se                                                                      | 2.577863  | -1.432133 | -0.429429 |
| P                                                                       | 2.989674  | 0.232144  | -1.721339 | P                                                                       | 3.053482  | 0.240104  | -1.716838 |
| H                                                                       | 4.216252  | 0.787709  | -1.346376 | H                                                                       | 4.255583  | 0.821662  | -1.304204 |
| H                                                                       | 3.280305  | -0.219208 | -3.012050 | H                                                                       | 3.399288  | -0.221028 | -2.990215 |
| 16<br>Eu(H <sub>2</sub> PTe <sub>2</sub> ) <sub>3</sub> B5050LYP SC ECP |           |           |           | 16<br>Am(H <sub>2</sub> PTe <sub>2</sub> ) <sub>3</sub> B5050LYP SC ECP |           |           |           |
| Eu                                                                      | 0.003938  | 0.005201  | 0.031466  | Am                                                                      | -0.000000 | 0.000000  | -0.003088 |
| Te                                                                      | -2.693371 | 1.617206  | -0.421294 | Te                                                                      | -2.734091 | 1.587147  | -0.393206 |
| Te                                                                      | -1.524943 | -1.937986 | -1.965990 | Te                                                                      | -1.586217 | -1.939025 | -2.033842 |
| P                                                                       | -3.236897 | -0.249118 | -1.844168 | P                                                                       | -3.295654 | -0.257357 | -1.839990 |
| H                                                                       | -3.568471 | 0.191643  | -3.129370 | H                                                                       | -3.657882 | 0.211177  | -3.106599 |
| H                                                                       | -4.455117 | -0.808996 | -1.446590 | H                                                                       | -4.502583 | -0.828522 | -1.425295 |
| Te                                                                      | 0.751126  | 1.881916  | 2.479778  | Te                                                                      | 0.732047  | 1.899936  | 2.480870  |
| Te                                                                      | -0.755652 | -1.878105 | 2.468102  | Te                                                                      | -0.732047 | -1.899935 | 2.480870  |
| P                                                                       | -0.005767 | -0.000568 | 3.777712  | P                                                                       | -0.000000 | 0.000000  | 3.768703  |
| H                                                                       | -1.008895 | 0.389178  | 4.671047  | H                                                                       | -1.005966 | 0.378309  | 4.663298  |
| H                                                                       | 0.993087  | -0.394143 | 4.674141  | H                                                                       | 1.005966  | -0.378308 | 4.663299  |
| Te                                                                      | 1.536456  | 1.944271  | -1.963738 | Te                                                                      | 1.586217  | 1.939025  | -2.033842 |
| Te                                                                      | 2.699236  | -1.611338 | -0.418326 | Te                                                                      | 2.734090  | -1.587148 | -0.393206 |
| P                                                                       | 3.241088  | 0.247338  | -1.851469 | P                                                                       | 3.295654  | 0.257356  | -1.839990 |
| H                                                                       | 4.465621  | 0.802524  | -1.466909 | H                                                                       | 4.502583  | 0.828522  | -1.425296 |
| H                                                                       | 3.558561  | -0.199024 | -3.138307 | H                                                                       | 3.657881  | -0.211177 | -3.106600 |

|                                                                     |           |           |           |                                                                     |           |           |           |
|---------------------------------------------------------------------|-----------|-----------|-----------|---------------------------------------------------------------------|-----------|-----------|-----------|
| 16<br>Eu(H <sub>2</sub> PO <sub>2</sub> ) <sub>3</sub> PBE50 SC ECP |           |           |           | 16<br>Am(H <sub>2</sub> PO <sub>2</sub> ) <sub>3</sub> PBE50 SC ECP |           |           |           |
| Eu                                                                  | 0.009176  | -0.000012 | -0.000005 | Am                                                                  | -0.000298 | 0.000000  | 0.000000  |
| O                                                                   | -0.508936 | -2.017958 | 1.077832  | O                                                                   | -0.501687 | -2.084634 | 1.065440  |
| O                                                                   | -1.494324 | -1.447539 | -1.090429 | O                                                                   | -1.555367 | -1.475836 | -1.067318 |
| P                                                                   | -1.452981 | -2.498925 | -0.003225 | P                                                                   | -1.470125 | -2.547069 | -0.001631 |
| H                                                                   | -2.732459 | -2.747806 | 0.513373  | H                                                                   | -2.732454 | -2.819768 | 0.545283  |
| H                                                                   | -1.051494 | -3.743076 | -0.509188 | H                                                                   | -1.071807 | -3.774778 | -0.549911 |
| O                                                                   | 2.014296  | 0.571458  | 1.083503  | O                                                                   | 2.055207  | 0.617760  | 1.060965  |
| O                                                                   | 2.014310  | -0.571449 | -1.083501 | O                                                                   | 2.055207  | -0.617760 | -1.060965 |
| P                                                                   | 2.903189  | 0.000015  | 0.000002  | P                                                                   | 2.940257  | 0.000000  | -0.000000 |
| H                                                                   | 3.769662  | -0.975107 | 0.514170  | H                                                                   | 3.806255  | -0.952672 | 0.556495  |
| H                                                                   | 3.769641  | 0.975155  | -0.514166 | H                                                                   | 3.806255  | 0.952672  | -0.556496 |
| O                                                                   | -1.494311 | 1.447525  | 1.090425  | O                                                                   | -1.555367 | 1.475836  | 1.067318  |
| O                                                                   | -0.508924 | 2.017936  | -1.077838 | O                                                                   | -0.501687 | 2.084634  | -1.065440 |
| P                                                                   | -1.452958 | 2.498913  | 0.003224  | P                                                                   | -1.470125 | 2.547069  | 0.001631  |
| H                                                                   | -1.051451 | 3.743057  | 0.509189  | H                                                                   | -1.071807 | 3.774779  | 0.549911  |
| H                                                                   | -2.732435 | 2.747815  | -0.513367 | H                                                                   | -2.732454 | 2.819768  | -0.545283 |
| 16<br>Eu(H <sub>2</sub> PS <sub>2</sub> ) <sub>3</sub> PBE50 SC ECP |           |           |           | 16<br>Am(H <sub>2</sub> PS <sub>2</sub> ) <sub>3</sub> PBE50 SC ECP |           |           |           |
| Eu                                                                  | 0.000000  | 0.000000  | 0.028804  | Am                                                                  | -0.000002 | -0.000000 | 0.012164  |
| S                                                                   | -2.408211 | 1.329232  | -0.448392 | S                                                                   | -2.462468 | 1.306067  | -0.423821 |
| S                                                                   | -1.445044 | -1.639446 | -1.714490 | S                                                                   | -1.464855 | -1.607365 | -1.788554 |
| P                                                                   | -2.849354 | -0.224021 | -1.622926 | P                                                                   | -2.895133 | -0.224835 | -1.629070 |
| H                                                                   | -3.154977 | 0.223955  | -2.915604 | H                                                                   | -3.238761 | 0.250618  | -2.902367 |
| H                                                                   | -4.070940 | -0.783501 | -1.223672 | H                                                                   | -4.095547 | -0.822775 | -1.220695 |



|   |           |           |           |   |           |           |           |
|---|-----------|-----------|-----------|---|-----------|-----------|-----------|
| S | 0.600308  | 1.573992  | 2.258330  | S | 0.644829  | 1.556692  | 2.278050  |
| S | -0.600308 | -1.573992 | 2.258330  | S | -0.644828 | -1.556692 | 2.278052  |
| P | 0.000000  | 0.000000  | 3.329291  | P | 0.000003  | -0.000000 | 3.347585  |
| H | -1.016554 | 0.382420  | 4.215749  | H | -1.004578 | 0.412209  | 4.234618  |
| H | 1.016554  | -0.382420 | 4.215749  | H | 1.004587  | -0.412210 | 4.234614  |
| S | 1.445044  | 1.639446  | -1.714489 | S | 1.464853  | 1.607365  | -1.788553 |
| S | 2.408210  | -1.329232 | -0.448392 | S | 2.462464  | -1.306069 | -0.423819 |
| P | 2.849354  | 0.224021  | -1.622926 | P | 2.895132  | 0.224834  | -1.629066 |
| H | 4.070940  | 0.783500  | -1.223672 | H | 4.095545  | 0.822774  | -1.220689 |
| H | 3.154977  | -0.223955 | -2.915604 | H | 3.238762  | -0.250618 | -2.902363 |

|    |                                                                |           |           |    |                                                                |           |           |
|----|----------------------------------------------------------------|-----------|-----------|----|----------------------------------------------------------------|-----------|-----------|
| 16 | Eu(H <sub>2</sub> PSe <sub>2</sub> ) <sub>3</sub> PBE50 SC ECP |           |           | 16 | Am(H <sub>2</sub> PSe <sub>2</sub> ) <sub>3</sub> PBE50 SC ECP |           |           |
| Eu | -0.000599                                                      | -0.000221 | 0.049006  | Am | 0.000000                                                       | -0.000000 | 0.015935  |
| Se | -2.504265                                                      | 1.431427  | -0.412244 | Se | -2.551332                                                      | 1.418345  | -0.402330 |
| Se | -1.436718                                                      | -1.757606 | -1.796027 | Se | -1.471420                                                      | -1.731555 | -1.869219 |
| P  | -2.943689                                                      | -0.229506 | -1.703491 | P  | -3.003642                                                      | -0.236060 | -1.696315 |
| H  | -3.225562                                                      | 0.231605  | -2.996933 | H  | -3.346089                                                      | 0.235231  | -2.971177 |
| H  | -4.175871                                                      | -0.789933 | -1.339670 | H  | -4.207444                                                      | -0.829889 | -1.293048 |
| Se | 0.660212                                                       | 1.695660  | 2.337538  | Se | 0.709850                                                       | 1.675554  | 2.340059  |
| Se | -0.659938                                                      | -1.695374 | 2.338493  | Se | -0.709849                                                      | -1.675553 | 2.340059  |
| P  | 0.000757                                                       | 0.000246  | 3.481141  | P  | -0.000000                                                      | 0.000000  | 3.481570  |
| H  | -1.010633                                                      | 0.387310  | 4.371346  | H  | -0.999276                                                      | 0.418119  | 4.371320  |
| H  | 1.013083                                                       | -0.386793 | 4.370287  | H  | 0.999276                                                       | -0.418118 | 4.371321  |
| Se | 1.436283                                                       | 1.757539  | -1.795151 | Se | 1.471421                                                       | 1.731555  | -1.869220 |
| Se | 2.502866                                                       | -1.432213 | -0.412319 | Se | 2.551333                                                       | -1.418346 | -0.402331 |
| P  | 2.943131                                                       | 0.229352  | -1.702433 | P  | 3.003642                                                       | 0.236059  | -1.696316 |
| H  | 4.175088                                                       | 0.789563  | -1.337517 | H  | 4.207445                                                       | 0.829888  | -1.293050 |
| H  | 3.225854                                                       | -0.231056 | -2.995942 | H  | 3.346088                                                       | -0.235231 | -2.971178 |

|    |                                                                |           |           |    |                                                                |           |           |
|----|----------------------------------------------------------------|-----------|-----------|----|----------------------------------------------------------------|-----------|-----------|
| 16 | Eu(H <sub>2</sub> PTe <sub>2</sub> ) <sub>3</sub> PBE50 SC ECP |           |           | 16 | Am(H <sub>2</sub> PTe <sub>2</sub> ) <sub>3</sub> PBE50 SC ECP |           |           |
| Eu | 0.008171                                                       | 0.019601  | 0.021671  | Am | 0.000000                                                       | -0.000001 | 0.019427  |
| Te | -2.645184                                                      | 1.623224  | -0.418385 | Te | -2.703037                                                      | 1.551365  | -0.280138 |
| Te | -1.481054                                                      | -1.920269 | -1.938925 | Te | -1.536048                                                      | -1.902516 | -2.003491 |
| P  | -3.178848                                                      | -0.250039 | -1.797692 | P  | -3.202127                                                      | -0.205136 | -1.821792 |
| H  | -3.536147                                                      | 0.175926  | -3.085145 | H  | -3.490414                                                      | 0.320548  | -3.089597 |
| H  | -4.389443                                                      | -0.815822 | -1.372764 | H  | -4.440284                                                      | -0.777404 | -1.496762 |
| Te | 0.750055                                                       | 1.872916  | 2.436083  | Te | 0.484972                                                       | 1.968793  | 2.450468  |
| Te | -0.770073                                                      | -1.857447 | 2.400474  | Te | -0.484970                                                      | -1.968794 | 2.450469  |
| P  | -0.014209                                                      | -0.002387 | 3.698804  | P  | -0.000001                                                      | 0.000000  | 3.708477  |
| H  | -1.017364                                                      | 0.388140  | 4.597806  | H  | -1.049092                                                      | 0.247448  | 4.605403  |
| H  | 0.985428                                                       | -0.408320 | 4.594832  | H  | 1.049088                                                       | -0.247446 | 4.605406  |
| Te | 1.519948                                                       | 1.943758  | -1.932126 | Te | 1.536050                                                       | 1.902517  | -2.003488 |
| Te | 2.653206                                                       | -1.602206 | -0.400088 | Te | 2.703037                                                       | -1.551367 | -0.280142 |
| P  | 3.189806                                                       | 0.243781  | -1.814149 | P  | 3.202127                                                       | 0.205136  | -1.821794 |
| H  | 4.421404                                                       | 0.792279  | -1.428649 | H  | 4.440285                                                       | 0.777402  | -1.496764 |
| H  | 3.504312                                                       | -0.203134 | -3.105658 | H  | 3.490411                                                       | -0.320547 | -3.089600 |

|    |                                                                |          |          |    |                                                                |          |           |
|----|----------------------------------------------------------------|----------|----------|----|----------------------------------------------------------------|----------|-----------|
| 16 | Eu(H <sub>2</sub> PO <sub>2</sub> ) <sub>3</sub> B2PLYP SC ECP |          |          | 16 | Am(H <sub>2</sub> PO <sub>2</sub> ) <sub>3</sub> B2PLYP SC ECP |          |           |
| Eu | -0.034894                                                      | 0.000725 | 0.010706 | Am | 0.062584                                                       | 0.204810 | -0.083097 |

|    |                           |           |           |    |                           |           |           |
|----|---------------------------|-----------|-----------|----|---------------------------|-----------|-----------|
| O  | -0.518945                 | -2.034768 | 1.103576  | O  | -0.380608                 | -1.843334 | 1.090131  |
| O  | -1.506965                 | -1.481668 | -1.112926 | O  | -1.416535                 | -1.390720 | -1.137628 |
| P  | -1.434500                 | -2.554166 | -0.016694 | P  | -1.314010                 | -2.408335 | 0.006876  |
| H  | -2.713975                 | -2.867901 | 0.473286  | H  | -2.583234                 | -2.703067 | 0.535258  |
| H  | -0.963466                 | -3.775218 | -0.527613 | H  | -0.850760                 | -3.651686 | -0.457524 |
| O  | 1.982576                  | 0.659475  | 1.057005  | O  | 2.212533                  | 0.614033  | 1.017919  |
| O  | 1.971917                  | -0.664931 | -1.049691 | O  | 2.032737                  | -0.658108 | -1.116678 |
| P  | 2.878212                  | -0.002152 | -0.001303 | P  | 2.997756                  | -0.218572 | -0.000642 |
| H  | 3.748161                  | -0.936217 | 0.585172  | H  | 3.596744                  | -1.337924 | 0.603440  |
| H  | 3.740911                  | 0.933160  | -0.596926 | H  | 4.085353                  | 0.495516  | -0.532114 |
| O  | -1.514242                 | 1.489942  | 1.117853  | O  | -1.640561                 | 1.458437  | 1.053380  |
| O  | -0.511725                 | 2.031902  | -1.094455 | O  | -0.670277                 | 2.283074  | -1.085005 |
| P  | -1.436652                 | 2.556087  | 0.015507  | P  | -1.696784                 | 2.590286  | 0.014450  |
| H  | -0.973041                 | 3.781949  | 0.522131  | H  | -1.445244                 | 3.838291  | 0.609375  |
| H  | -2.713369                 | 2.863784  | -0.485630 | H  | -2.989692                 | 2.727297  | -0.518143 |
| 16 | Eu(H2PS2)3 B2PLYP SC ECP  |           |           | 16 | Am(H2PS2)3 B2PLYP SC ECP  |           |           |
| Eu | 0.002977                  | -0.003025 | -0.025807 | Am | 0.000095                  | 0.001053  | 0.013836  |
| S  | -2.450527                 | 1.297860  | -0.331074 | S  | -2.498098                 | 1.279256  | -0.344942 |
| S  | -1.455273                 | -1.596598 | -1.828837 | S  | -1.425727                 | -1.577815 | -1.873084 |
| P  | -2.907948                 | -0.220290 | -1.581260 | P  | -2.900602                 | -0.222774 | -1.630755 |
| H  | -3.304374                 | 0.282091  | -2.833089 | H  | -3.274640                 | 0.299568  | -2.881388 |
| H  | -4.090458                 | -0.843223 | -1.146909 | H  | -4.084492                 | -0.869615 | -1.236617 |
| S  | 0.677530                  | 1.567758  | 2.195460  | S  | 0.721604                  | 1.550591  | 2.274705  |
| S  | -0.667540                 | -1.576931 | 2.193713  | S  | -0.721809                 | -1.550609 | 2.274036  |
| P  | -0.004700                 | -0.001159 | 3.270540  | P  | -0.000214                 | -0.000299 | 3.349013  |
| H  | -1.014555                 | 0.426736  | 4.148995  | H  | -0.987566                 | 0.455761  | 4.239193  |
| H  | 0.988167                  | -0.421857 | 4.171749  | H  | 0.987325                  | -0.456420 | 4.238953  |
| S  | 1.452123                  | 1.591623  | -1.841121 | S  | 1.427168                  | 1.579194  | -1.873031 |
| S  | 2.460556                  | -1.296753 | -0.341537 | S  | 2.497564                  | -1.278173 | -0.343730 |
| P  | 2.911453                  | 0.222458  | -1.592611 | P  | 2.900620                  | 0.222673  | -1.630825 |
| H  | 4.091375                  | 0.850703  | -1.158464 | H  | 4.085472                  | 0.868468  | -1.237907 |
| H  | 3.311195                  | -0.279394 | -2.843663 | H  | 3.273297                  | -0.300859 | -2.881372 |
| 16 | Eu(H2PSe2)3 B2PLYP SC ECP |           |           | 16 | Am(H2PSe2)3 B2PLYP SC ECP |           |           |
| Eu | -0.140092                 | -0.246071 | -0.105623 | Am | -0.233704                 | -0.149017 | -0.049008 |
| Se | -2.629866                 | 1.221841  | -0.176958 | Se | -2.781241                 | 1.251342  | -0.278920 |
| Se | -1.699597                 | -1.779630 | -2.049965 | Se | -1.625622                 | -1.660624 | -2.199484 |
| P  | -3.150780                 | -0.196343 | -1.726264 | P  | -3.175154                 | -0.183318 | -1.858071 |
| H  | -3.395597                 | 0.476498  | -2.937350 | H  | -3.459083                 | 0.491849  | -3.058644 |
| H  | -4.416227                 | -0.754060 | -1.474200 | H  | -4.402087                 | -0.825593 | -1.617500 |
| Se | 0.606242                  | 1.687036  | 1.889692  | Se | 0.357948                  | 1.811391  | 2.035920  |
| Se | -0.597634                 | -1.749864 | 2.389988  | Se | -0.520999                 | -1.757835 | 2.438706  |
| P  | 0.218872                  | 0.058338  | 3.270396  | P  | 0.313434                  | 0.047475  | 3.302972  |
| H  | -0.613363                 | 0.489406  | 4.318533  | H  | -0.350420                 | 0.339376  | 4.507605  |
| H  | 1.396760                  | -0.249222 | 3.974049  | H  | 1.615740                  | -0.212750 | 3.764690  |
| Se | 1.372133                  | 1.606183  | -1.851743 | Se | 1.376699                  | 1.585681  | -1.827956 |
| Se | 2.427723                  | -1.558750 | -0.290547 | Se | 2.384721                  | -1.418491 | 0.015640  |
| P  | 2.979251                  | 0.224808  | -1.417001 | P  | 2.947254                  | 0.178985  | -1.351074 |
| H  | 4.013734                  | 0.900545  | -0.744491 | H  | 4.065338                  | 0.859855  | -0.835665 |
| H  | 3.628445                  | -0.130716 | -2.612432 | H  | 3.487180                  | -0.358328 | -2.533130 |

|                                                                       |                                                                       |
|-----------------------------------------------------------------------|-----------------------------------------------------------------------|
| 16<br>Eu(H <sub>2</sub> PTe <sub>2</sub> ) <sub>3</sub> B2PLYP SC ECP | 16<br>Am(H <sub>2</sub> PTe <sub>2</sub> ) <sub>3</sub> B2PLYP SC ECP |
| Eu 0.037644 0.036583 -0.170547                                        | Am 0.048442 0.036414 -0.133571                                        |
| Te -2.654862 1.567147 -0.165411                                       | Te -2.680817 1.583394 -0.172393                                       |
| Te -1.616943 -1.857520 -2.076261                                      | Te -1.596442 -1.881999 -2.043713                                      |
| P -3.334508 -0.235396 -1.618709                                       | P -3.313462 -0.248704 -1.613365                                       |
| H -3.871326 0.252407 -2.824137                                        | H -3.826370 0.227158 -2.833601                                        |
| H -4.471593 -0.868107 -1.082183                                       | H -4.458864 -0.883248 -1.097706                                       |
| Te 0.664430 1.964673 2.225821                                         | Te 0.712104 1.964527 2.270392                                         |
| Te -0.646337 -1.943097 2.119006                                       | Te -0.680473 -1.950704 2.150096                                       |
| P -0.050639 -0.003412 3.447562                                        | P -0.078960 0.004620 3.459961                                         |
| H -1.116499 0.313895 4.310418                                         | H -1.163830 0.348746 4.286909                                         |
| H 0.931758 -0.349672 4.394112                                         | H 0.869285 -0.359521 4.433349                                         |
| Te 1.681890 1.897010 -2.076994                                        | Te 1.688573 1.923656 -2.056856                                        |
| Te 2.713500 -1.520102 -0.164400                                       | Te 2.765342 -1.549428 -0.211389                                       |
| P 3.369145 0.222980 -1.693173                                         | P 3.370182 0.229379 -1.719021                                         |
| H 4.558518 0.828200 -1.247490                                         | H 4.568957 0.832091 -1.295754                                         |
| H 3.805825 -0.305594 -2.921530                                        | H 3.776329 -0.276384 -2.967256                                        |

|                                                                     |                                                                     |
|---------------------------------------------------------------------|---------------------------------------------------------------------|
| 16<br>Eu(H <sub>2</sub> PO <sub>2</sub> ) <sub>3</sub> B3LYP LC ECP | 16<br>Am(H <sub>2</sub> PO <sub>2</sub> ) <sub>3</sub> B3LYP LC ECP |
| Eu 0.002311 -0.000016 0.000004                                      | Am 0.000551 0.000000 0.000000                                       |
| O -0.602075 -2.033539 1.140774                                      | O -0.654096 -2.077678 1.154826                                      |
| O -1.461066 -1.536291 -1.140304                                     | O -1.472587 -1.604981 -1.154273                                     |
| P -1.482477 -2.563034 0.000436                                      | P -1.510622 -2.615442 0.000365                                      |
| H -2.799949 -2.808104 0.441622                                      | H -2.836145 -2.857963 0.419116                                      |
| H -1.039928 -3.828013 -0.440501                                     | H -1.058925 -3.885034 -0.418275                                     |
| O 2.065075 0.492926 1.142013                                        | O 2.127139 0.470277 1.155507                                        |
| O 2.065084 -0.492919 -1.142002                                      | O 2.127139 -0.470277 -1.155507                                      |
| P 2.964360 0.000018 0.000003                                        | P 3.021145 0.000000 0.000000                                        |
| H 3.837015 -1.018332 0.438043                                       | H 3.894388 -1.027177 0.416562                                       |
| H 3.836978 1.018397 -0.438044                                       | H 3.894388 1.027177 -0.416562                                       |
| O -1.461040 1.536283 1.140305                                       | O -1.472587 1.604981 1.154273                                       |
| O -0.602051 2.033509 -1.140778                                      | O -0.654096 2.077678 -1.154826                                      |
| P -1.482442 2.563020 -0.000440                                      | P -1.510623 2.615442 -0.000365                                      |
| H -1.039880 3.827996 0.440490                                       | H -1.058925 3.885034 0.418275                                       |
| H -2.799914 2.808102 -0.441622                                      | H -2.836145 2.857963 -0.419116                                      |

|                                                                     |                                                                     |
|---------------------------------------------------------------------|---------------------------------------------------------------------|
| 16<br>Eu(H <sub>2</sub> PS <sub>2</sub> ) <sub>3</sub> B3LYP LC ECP | 16<br>Am(H <sub>2</sub> PS <sub>2</sub> ) <sub>3</sub> B3LYP LC ECP |
| Eu 0.000000 0.000000 0.026132                                       | Am 0.000000 0.000000 0.030102                                       |
| S -2.436129 1.393776 -0.553226                                      | S -2.489032 1.397261 -0.591737                                      |
| S -1.536533 -1.700583 -1.691875                                     | S -1.593226 -1.716155 -1.715986                                     |
| P -2.926101 -0.227052 -1.663084                                     | P -2.971589 -0.232033 -1.694018                                     |
| H -3.234289 0.163370 -2.983146                                      | H -3.272518 0.154218 -3.016778                                      |
| H -4.167430 -0.741861 -1.234158                                     | H -4.217115 -0.739429 -1.268986                                     |
| S 0.520257 1.627990 2.326042                                        | S 0.516661 1.635083 2.394861                                        |
| S -0.520256 -1.627990 2.326042                                      | S -0.516660 -1.635083 2.394861                                      |
| P 0.000000 0.000000 3.412258                                        | P 0.000000 0.000000 3.472994                                        |
| H -1.039166 0.327567 4.308295                                       | H -1.039831 0.324241 4.369138                                       |
| H 1.039167 -0.327567 4.308295                                       | H 1.039831 -0.324241 4.369138                                       |

|                                                                        |           |           |           |                                                                        |           |           |           |
|------------------------------------------------------------------------|-----------|-----------|-----------|------------------------------------------------------------------------|-----------|-----------|-----------|
| S                                                                      | 1.536533  | 1.700583  | -1.691875 | S                                                                      | 1.593226  | 1.716155  | -1.715986 |
| S                                                                      | 2.436129  | -1.393776 | -0.553226 | S                                                                      | 2.489032  | -1.397261 | -0.591737 |
| P                                                                      | 2.926101  | 0.227053  | -1.663084 | P                                                                      | 2.971589  | 0.232033  | -1.694018 |
| H                                                                      | 4.167430  | 0.741861  | -1.234157 | H                                                                      | 4.217115  | 0.739429  | -1.268986 |
| H                                                                      | 3.234289  | -0.163370 | -2.983146 | H                                                                      | 3.272517  | -0.154218 | -3.016778 |
| 16<br>Eu(H <sub>2</sub> PSe <sub>2</sub> ) <sub>3</sub> B3LYP LC ECP   |           |           |           | 16<br>Am(H <sub>2</sub> PSe <sub>2</sub> ) <sub>3</sub> B3LYP LC ECP   |           |           |           |
| Eu                                                                     | -0.000155 | 0.000044  | 0.033158  | Am                                                                     | 0.000000  | 0.000000  | 0.031339  |
| Se                                                                     | -2.543160 | 1.497964  | -0.504327 | Se                                                                     | -2.601608 | 1.499514  | -0.531785 |
| Se                                                                     | -1.530942 | -1.817381 | -1.798045 | Se                                                                     | -1.587419 | -1.830090 | -1.829859 |
| P                                                                      | -3.039176 | -0.237287 | -1.736581 | P                                                                      | -3.086915 | -0.240866 | -1.762239 |
| H                                                                      | -3.348462 | 0.173068  | -3.050164 | H                                                                      | -3.394107 | 0.170739  | -3.075659 |
| H                                                                      | -4.281033 | -0.767443 | -1.328786 | H                                                                      | -4.329190 | -0.770853 | -1.356359 |
| Se                                                                     | 0.615268  | 1.745120  | 2.393528  | Se                                                                     | 0.604421  | 1.756702  | 2.456095  |
| Se                                                                     | -0.614837 | -1.744877 | 2.393803  | Se                                                                     | -0.604421 | -1.756702 | 2.456095  |
| P                                                                      | 0.000179  | 0.000233  | 3.556635  | P                                                                      | 0.000000  | 0.000000  | 3.608259  |
| H                                                                      | -1.026397 | 0.354579  | 4.456713  | H                                                                      | -1.028796 | 0.347585  | 4.508049  |
| H                                                                      | 1.026714  | -0.354007 | 4.456801  | H                                                                      | 1.028796  | -0.347585 | 4.508049  |
| Se                                                                     | 1.531528  | 1.817889  | -1.796870 | Se                                                                     | 1.587419  | 1.830089  | -1.829860 |
| Se                                                                     | 2.542340  | -1.498624 | -0.504927 | Se                                                                     | 2.601608  | -1.499514 | -0.531785 |
| P                                                                      | 3.039010  | 0.237032  | -1.736326 | P                                                                      | 3.086915  | 0.240865  | -1.762240 |
| H                                                                      | 4.281130  | 0.766444  | -1.328368 | H                                                                      | 4.329190  | 0.770852  | -1.356360 |
| H                                                                      | 3.347993  | -0.172755 | -3.050158 | H                                                                      | 3.394106  | -0.170740 | -3.075659 |
| 16<br>Eu(H <sub>2</sub> PTe <sub>2</sub> ) <sub>3</sub> B3LYP LC ECP   |           |           |           | 16<br>Am(H <sub>2</sub> PTe <sub>2</sub> ) <sub>3</sub> B3LYP LC ECP   |           |           |           |
| Eu                                                                     | -0.000026 | -0.000022 | 0.041422  | Am                                                                     | 0.000075  | -0.000051 | 0.043459  |
| Te                                                                     | -2.715318 | 1.654778  | -0.453029 | Te                                                                     | -2.778126 | 1.651085  | -0.473144 |
| Te                                                                     | -1.556805 | -1.989624 | -1.951553 | Te                                                                     | -1.597378 | -2.004110 | -1.991415 |
| P                                                                      | -3.250868 | -0.247410 | -1.869898 | P                                                                      | -3.286051 | -0.257000 | -1.892924 |
| H                                                                      | -3.559709 | 0.180756  | -3.178665 | H                                                                      | -3.594450 | 0.175909  | -3.199926 |
| H                                                                      | -4.500001 | -0.786355 | -1.494453 | H                                                                      | -4.532885 | -0.803147 | -1.521370 |
| Te                                                                     | 0.716280  | 1.925307  | 2.517405  | Te                                                                     | 0.724636  | 1.934756  | 2.580718  |
| Te                                                                     | -0.716336 | -1.925306 | 2.517428  | Te                                                                     | -0.724546 | -1.934755 | 2.580783  |
| P                                                                      | 0.000090  | -0.000031 | 3.818331  | P                                                                      | -0.000090 | 0.000073  | 3.863655  |
| H                                                                      | -1.014712 | 0.366062  | 4.728156  | H                                                                      | -1.013895 | 0.369777  | 4.772675  |
| H                                                                      | 1.015072  | -0.366209 | 4.727919  | H                                                                      | 1.013521  | -0.369544 | 4.772927  |
| Te                                                                     | 1.556612  | 1.989554  | -1.951660 | Te                                                                     | 1.597637  | 2.004289  | -1.991073 |
| Te                                                                     | 2.715332  | -1.654727 | -0.452839 | Te                                                                     | 2.778106  | -1.651358 | -0.473582 |
| P                                                                      | 3.250787  | 0.247452  | -1.869757 | P                                                                      | 3.286096  | 0.256947  | -1.893044 |
| H                                                                      | 4.499846  | 0.786521  | -1.494240 | H                                                                      | 4.533026  | 0.802880  | -1.521500 |
| H                                                                      | 3.559756  | -0.180746 | -3.178482 | H                                                                      | 3.594325  | -0.175755 | -3.200155 |
| 16<br>Eu(H <sub>2</sub> PO <sub>2</sub> ) <sub>3</sub> B5050LYP LC ECP |           |           |           | 16<br>Am(H <sub>2</sub> PO <sub>2</sub> ) <sub>3</sub> B5050LYP LC ECP |           |           |           |
| Eu                                                                     | 0.001334  | -0.000015 | 0.000005  | Am                                                                     | -0.000339 | 0.000000  | 0.000000  |
| O                                                                      | -0.594755 | -2.053092 | 1.117660  | O                                                                      | -0.644249 | -2.097852 | 1.130595  |
| O                                                                      | -1.481564 | -1.539790 | -1.116481 | O                                                                      | -1.494727 | -1.607640 | -1.130468 |
| P                                                                      | -1.485170 | -2.569406 | 0.000548  | P                                                                      | -1.513126 | -2.621773 | 0.000188  |
| H                                                                      | -2.778531 | -2.819306 | 0.455370  | H                                                                      | -2.814164 | -2.868670 | 0.435222  |
| H                                                                      | -1.056192 | -3.814614 | -0.455059 | H                                                                      | -1.075725 | -3.871808 | -0.434536 |

|    |                                                                   |           |           |    |                                                                   |           |           |
|----|-------------------------------------------------------------------|-----------|-----------|----|-------------------------------------------------------------------|-----------|-----------|
| O  | 2.077048                                                          | 0.510105  | 1.118115  | O  | 2.138513                                                          | 0.489182  | 1.131237  |
| O  | 2.077055                                                          | -0.510099 | -1.118105 | O  | 2.138514                                                          | -0.489182 | -1.131237 |
| P  | 2.969915                                                          | 0.000016  | 0.000002  | P  | 3.026356                                                          | 0.000000  | 0.000000  |
| H  | 3.833478                                                          | -0.995473 | 0.453202  | H  | 3.890469                                                          | -1.004185 | 0.433375  |
| H  | 3.833445                                                          | 0.995531  | -0.453204 | H  | 3.890469                                                          | 1.004186  | -0.433375 |
| O  | -1.481541                                                         | 1.539783  | 1.116482  | O  | -1.494727                                                         | 1.607640  | 1.130468  |
| O  | -0.594732                                                         | 2.053066  | -1.117663 | O  | -0.644249                                                         | 2.097851  | -1.130595 |
| P  | -1.485139                                                         | 2.569394  | -0.000551 | P  | -1.513126                                                         | 2.621772  | -0.000188 |
| H  | -1.056151                                                         | 3.814600  | 0.455049  | H  | -1.075725                                                         | 3.871808  | 0.434536  |
| H  | -2.778499                                                         | 2.819302  | -0.455371 | H  | -2.814164                                                         | 2.868670  | -0.435222 |
| 16 | Eu(H <sub>2</sub> PS <sub>2</sub> ) <sub>3</sub> B5050LYP LC ECP  |           |           | 16 | Am(H <sub>2</sub> PS <sub>2</sub> ) <sub>3</sub> B5050LYP LC ECP  |           |           |
| Eu | 0.000000                                                          | 0.000000  | 0.028417  | Am | 0.000000                                                          | 0.000000  | 0.029955  |
| S  | -2.464337                                                         | 1.373147  | -0.560893 | S  | -2.516261                                                         | 1.377850  | -0.597389 |
| S  | -1.557799                                                         | -1.686617 | -1.713037 | S  | -1.615519                                                         | -1.701054 | -1.735630 |
| P  | -2.952176                                                         | -0.230794 | -1.680591 | P  | -2.998761                                                         | -0.233654 | -1.709537 |
| H  | -3.253865                                                         | 0.165920  | -2.981838 | H  | -3.293353                                                         | 0.158614  | -3.013603 |
| H  | -4.175747                                                         | -0.747992 | -1.259870 | H  | -4.225967                                                         | -0.743959 | -1.291462 |
| S  | 0.536356                                                          | 1.609524  | 2.357423  | S  | 0.522188                                                          | 1.620022  | 2.422332  |
| S  | -0.536356                                                         | -1.609524 | 2.357423  | S  | -0.522188                                                         | -1.620022 | 2.422332  |
| P  | 0.000000                                                          | 0.000000  | 3.446666  | P  | 0.000000                                                          | 0.000000  | 3.503948  |
| H  | -1.023986                                                         | 0.337675  | 4.329308  | H  | -1.027154                                                         | 0.327874  | 4.386380  |
| H  | 1.023986                                                          | -0.337675 | 4.329308  | H  | 1.027154                                                          | -0.327873 | 4.386380  |
| S  | 1.557799                                                          | 1.686617  | -1.713037 | S  | 1.615519                                                          | 1.701054  | -1.735630 |
| S  | 2.464337                                                          | -1.373147 | -0.560893 | S  | 2.516261                                                          | -1.377851 | -0.597389 |
| P  | 2.952177                                                          | 0.230794  | -1.680591 | P  | 2.998761                                                          | 0.233654  | -1.709538 |
| H  | 4.175747                                                          | 0.747992  | -1.259870 | H  | 4.225967                                                          | 0.743959  | -1.291463 |
| H  | 3.253865                                                          | -0.165920 | -2.981838 | H  | 3.293353                                                          | -0.158614 | -3.013603 |
| 16 | Eu(H <sub>2</sub> PSe <sub>2</sub> ) <sub>3</sub> B5050LYP LC ECP |           |           | 16 | Am(H <sub>2</sub> PSe <sub>2</sub> ) <sub>3</sub> B5050LYP LC ECP |           |           |
| Eu | -0.000299                                                         | -0.000045 | 0.038448  | Am | 0.000000                                                          | 0.000000  | 0.032476  |
| Se | -2.577108                                                         | 1.476044  | -0.511361 | Se | -2.630292                                                         | 1.482852  | -0.548411 |
| Se | -1.555284                                                         | -1.801797 | -1.820934 | Se | -1.615438                                                         | -1.817734 | -1.848761 |
| P  | -3.071106                                                         | -0.238269 | -1.761673 | P  | -3.121638                                                         | -0.243954 | -1.783784 |
| H  | -3.366466                                                         | 0.181486  | -3.057144 | H  | -3.421974                                                         | 0.169233  | -3.080006 |
| H  | -4.296445                                                         | -0.771780 | -1.367210 | H  | -4.345358                                                         | -0.774046 | -1.380520 |
| Se | 0.616912                                                          | 1.731224  | 2.433894  | Se | 0.610691                                                          | 1.741143  | 2.491364  |
| Se | -0.616884                                                         | -1.730996 | 2.434259  | Se | -0.610691                                                         | -1.741143 | 2.491364  |
| P  | 0.000384                                                          | 0.000111  | 3.604175  | P  | 0.000000                                                          | 0.000000  | 3.651209  |
| H  | -1.014487                                                         | 0.356336  | 4.490050  | H  | -1.016804                                                         | 0.351839  | 4.536318  |
| H  | 1.015823                                                          | -0.356156 | 4.489380  | H  | 1.016804                                                          | -0.351838 | 4.536318  |
| Se | 1.555014                                                          | 1.801700  | -1.820664 | Se | 1.615438                                                          | 1.817734  | -1.848761 |
| Se | 2.576501                                                          | -1.476266 | -0.511143 | Se | 2.630293                                                          | -1.482852 | -0.548411 |
| P  | 3.070832                                                          | 0.238175  | -1.761140 | P  | 3.121638                                                          | 0.243953  | -1.783785 |
| H  | 4.296051                                                          | 0.771665  | -1.366278 | H  | 4.345358                                                          | 0.774045  | -1.380521 |
| H  | 3.366562                                                          | -0.181432 | -3.056575 | H  | 3.421974                                                          | -0.169233 | -3.080007 |
| 16 | Eu(H <sub>2</sub> PTe <sub>2</sub> ) <sub>3</sub> B5050LYP LC ECP |           |           | 16 | Am(H <sub>2</sub> PTe <sub>2</sub> ) <sub>3</sub> B5050LYP LC ECP |           |           |
| Eu | 0.000235                                                          | 0.000146  | 0.036277  | Am | -0.000001                                                         | -0.000005 | 0.037704  |
| Te | -2.757821                                                         | 1.636671  | -0.471015 | Te | -2.816388                                                         | 1.636249  | -0.495380 |
| Te | -1.596803                                                         | -1.974520 | -1.986359 | Te | -1.639661                                                         | -1.991479 | -2.020453 |

|    |           |           |           |    |           |           |           |
|----|-----------|-----------|-----------|----|-----------|-----------|-----------|
| P  | -3.305272 | -0.251955 | -1.895078 | P  | -3.340792 | -0.261449 | -1.917163 |
| H  | -3.615455 | 0.180156  | -3.184023 | H  | -3.650312 | 0.171824  | -3.205677 |
| H  | -4.530751 | -0.796811 | -1.513376 | H  | -4.564933 | -0.810062 | -1.537228 |
| Te | 0.732667  | 1.906451  | 2.559371  | Te | 0.732488  | 1.919212  | 2.619558  |
| Te | -0.733126 | -1.906411 | 2.558931  | Te | -0.732485 | -1.919213 | 2.619566  |
| P  | -0.000274 | -0.000122 | 3.871784  | P  | 0.000002  | 0.000003  | 3.914948  |
| H  | -1.002312 | 0.376419  | 4.765348  | H  | -1.002723 | 0.375106  | 4.808050  |
| H  | 1.001715  | -0.376762 | 4.765361  | H  | 1.002726  | -0.375098 | 4.808051  |
| Te | 1.596713  | 1.974251  | -1.987196 | Te | 1.639659  | 1.991479  | -2.020444 |
| Te | 2.758476  | -1.636152 | -0.470481 | Te | 2.816387  | -1.636255 | -0.495385 |
| P  | 3.305486  | 0.252010  | -1.895340 | P  | 3.340790  | 0.261449  | -1.917161 |
| H  | 4.530914  | 0.797222  | -1.513983 | H  | 4.564930  | 0.810060  | -1.537223 |
| H  | 3.615609  | -0.180592 | -3.184135 | H  | 3.650311  | -0.171820 | -3.205676 |

## F. Supplementary References

1. H.-J. Werner, *MOLPRO, version 2020.2, a package of ab initio programs*, H.-J. Werner, P. J. Knowles, G. Knizia, F. R. Manby, M. Schütz, P. Celani, W. Györfy, D. Kats, T. Korona, R. Lindh, A. Mitrushenkov, G. Rauhut, K. R. Shamasundar, T. B. Adler, R. D. Amos, S. J. Bennie, A. Bernhardsson, A. Berning, D. L. Cooper, M. J. O. Deegan, A. J. Dobbyn, F. Eckert, E. Goll, C. Hampel, A. Hesselmann, G. Hetzer, T. Hrenar, G. Jansen, C. Köppl, S. J. R. Lee, Y. Liu, A. W. Lloyd, Q. Ma, R. A. Mata, A. J. May, S. J. McNicholas, W. Meyer, T. F. Miller III, M. E. Mura, A. Nicklass, D. P. O'Neill, P. Palmieri, D. Peng, T. Petrenko, K. Pflüger, R. Pitzer, M. Reiher, T. Shiozaki, H. Stoll, A. J. Stone, R. Tarroni, T. Thorsteinsson, M. Wang, and M. Welborn, see <https://www.molpro.net>.
2. H.-J. Werner, P. J. Knowles, F. R. Manby, J. A. Black, K. Doll, A. Heßelmann, D. Kats, A. Köhn, T. Korona, D. A. Kreplin, Q. Ma, T. F. Miller, III, A. Mitrushchenkov, K. A. Peterson, I. Polyak, G. Rauhut and M. Sibaev, *The Journal of Chemical Physics*, 2020, **152**, 144107.
3. F. Neese, *WIREs Computational Molecular Science*, 2012, **2**, 73-78.
4. F. Neese, *WIREs Computational Molecular Science*, 2018, **8**, e1327.
5. F. Neese, F. Wennmohs, U. Becker and C. Riplinger, *The Journal of Chemical Physics*, 2020, **152**, 224108.
6. X. Cao and M. Dolg, *The Journal of Chemical Physics*, 2001, **115**, 7348-7355.
7. X. Cao and M. Dolg, *Journal of Molecular Structure: THEOCHEM*, 2002, **581**, 139-147.
8. X. Cao, M. Dolg and H. Stoll, *The Journal of Chemical Physics*, 2003, **118**, 487-496.
9. X. Cao and M. Dolg, *Journal of Molecular Structure: THEOCHEM*, 2004, **673**, 203-209.
10. Q. Lu and K. A. Peterson, *The Journal of Chemical Physics*, 2016, **145**, 054111.
11. R. Feng and K. A. Peterson, *The Journal of Chemical Physics*, 2017, **147**, 084108.
